1 3D Echo Planar Time-resolved Imaging (3D-EPTI) for ultrafast multi-parametric  
2 quantitative MRI

3 Fuyixue Wang <sup>a,b,†\*</sup>, Zijong Dong <sup>a,c,†</sup>, Timothy G. Reese <sup>a,d</sup>, Bruce Rosen <sup>a,b,d</sup>,  
4 Lawrence L. Wald <sup>a,b,d</sup>, Kawin Setsompop <sup>e,f</sup>

5 <sup>a</sup> Athinoula A. Martinos Center for Biomedical Imaging, Massachusetts General Hospital, Charlestown,  
6 Massachusetts, USA

7 <sup>b</sup> Harvard-MIT Health Sciences and Technology, MIT, Cambridge, Massachusetts, USA

8 <sup>c</sup> Department of Electrical Engineering and Computer Science, MIT, Cambridge, Massachusetts, USA

9 <sup>d</sup> Department of Radiology, Harvard Medical School, Boston, Massachusetts, USA

10 <sup>e</sup> Department of Radiology, Stanford University, Stanford, USA

11 <sup>f</sup> Department of Electrical Engineering, Stanford University, Stanford, USA

12 \_\_\_\_\_  
13  
14 Word Count: ~5600

15  
16 **\*Correspondence to:**

17 Fuyixue Wang,  
18 Athinoula A. Martinos Center for Biomedical Imaging  
19 Charlestown, MA, 02129  
20 United States  
21 Email: [fwang18@mgh.harvard.edu](mailto:fwang18@mgh.harvard.edu)

22  
23 <sup>†</sup>These authors contribute equally to the manuscript.

24  
25 **Grant sponsor:**

26 This work was supported by NIH NIBIB (R01-EB020613, R01-EB019437, R01-MH116173, P41-EB030006  
27 and U01-EB025162) and by the MGH/HST Athinoula A. Martinos Center for Biomedical Imaging; and was  
28 made possible by the resources provided by NIH Shared Instrumentation Grants S10-RR023401, S10-  
29 RR023043, and S10-RR019307.

1 **Abstract**

2 Multi-parametric quantitative MRI has shown great potential to improve the sensitivity and specificity of  
3 clinical diagnosis and to enhance our understanding of complex brain processes, but suffers from long scan time  
4 especially at high spatial resolution. To address this long-standing challenge, we introduce a novel approach,  
5 termed 3D Echo Planar Time-resolved Imaging (3D-EPTI), which significantly increases the acceleration  
6 capacity of MRI sampling, and provides high acquisition efficiency for multi-parametric MRI. This is achieved  
7 by exploiting the spatiotemporal correlation of MRI data at multiple timescales through new encoding strategies  
8 within and between efficient continuous readouts. Specifically, an optimized spatiotemporal CAIPI encoding  
9 within the readouts combined with a radial-block sampling strategy across the readouts enables an acceleration  
10 rate of 800 folds in the  $k$ - $t$  space. A subspace reconstruction was employed to resolve thousands of artifact-free  
11 high-quality multi-contrast images spaced at a time interval of  $\sim 1$  ms. We have demonstrated the ability of 3D-  
12 EPTI to provide robust and repeatable whole-brain simultaneous  $T_1$ ,  $T_2$ ,  $T_2^*$ , PD and  $B_1^+$  mapping at high  
13 isotropic resolution within minutes (e.g., 1-mm isotropic resolution in 3 minutes), and to enable submillimeter  
14 multi-parametric imaging to study detailed brain structures.

15  
16 **Key Words:** quantitative MRI, EPTI, fast imaging, multi-parametric, high resolution, relaxometry

17  
18  
19 **Highlights:**

- 20
- Ultra-fast acquisition for 3D multi-parametric quantitative MRI.
  - Simultaneous  $T_1$   $T_2$   $T_2^*$  PD and  $B_1^+$  mapping.
  - 3-minute scan at 1-mm isotropic resolution with whole-brain coverage.
  - Multi-parametric mapping at 700- $\mu$ m isotropic resolution in 10 minutes.
  - Repeatable quantification and cortical-depth analysis.
- 21  
22  
23  
24

## 1 **1. Introduction**

2 Multiparametric MRI provides quantitative measurements that are sensitive to a variety of tissue properties  
3 of the human brain. Its quantitative nature leads to less reliance on system conditions and human interpretation  
4 compared to standard qualitative images, and makes it possible to measure tissue properties among populations  
5 or along time, therefore providing great potentials to improve clinical diagnosis (Bernasconi et al., 1999;  
6 Falangola et al., 2007; Lescher et al., 2015; Ma et al., 2018; Müller et al., 2017; Ramani et al., 2006; Reitz et  
7 al., 2017; Tardif et al., 2011; Tofts, 2005; West et al., 2014) or to enhance our understanding of complex brain  
8 processes such as brain development or aging (Bozzali et al., 2016; Filo et al., 2019; Sled and Nossin-Manor,  
9 2013).

10 A major limitation of quantitative multiparametric MRI is its long acquisition time. This is due to the need  
11 to acquire a series of multi-contrast images in order to perform model fittings for quantitative parameter  
12 estimation, as well as the need to repeat such process for each parameter in multiparametric imaging.  
13 Acceleration of the acquisition has been made possible by using parallel imaging (Griswold et al., 2002;  
14 Pruessmann et al., 1999; Sodickson and Manning, 1997) or by enforcing prior knowledge of image properties  
15 through compressed-sensing theory (Lustig et al., 2007), both of which can help recover undersampled  $k$ -space.  
16 Together with new pulse sequence design, many fast quantification methods have been developed to obtain  
17 multiple parameters simultaneously (e.g.,  $T_1$ ,  $T_2$ ,  $T_2^*$ ) (Caan et al., 2019; Deoni et al., 2003; Fujita et al., 2019;  
18 Krauss et al., 2015; Metere et al., 2017; Warntjes et al., 2007; Warntjes et al., 2008). However, the ability to  
19 accelerate the acquisition is still limited and obtaining high-resolution multi-parametric MRI in clinical  
20 acceptable time remains a challenge.

21 Recently, an emerging area of research has been in the use of spatiotemporal correlation to achieve high  
22 acceleration for quantitative MRI. For example, MR fingerprinting (Boyacioglu et al., 2021; Cloos et al., 2016;  
23 Hong et al., 2019; Jiang et al., 2015; Ma et al., 2013; Ma et al., 2018; Wyatt et al., 2018) and MR multitasking  
24 (Christodoulou et al., 2018; Ma et al., 2020; Ma et al., 2021), have utilized spatiotemporal correlation between  
25 readouts after different RF excitations to accelerate multi-parametric imaging, which have shown promising  
26 results especially when used in conjunction with the low-rank subspace model (Christodoulou et al., 2018;  
27 Liang, 2007; Zhao et al., 2018). Another approach, Echo Planar Time-resolved Imaging (EPTI) (Dong et al.,  
28 2021a; Dong et al., 2020; Wang et al., 2019a; Wang et al., 2019b; Wang et al., 2021), has been developed  
29 recently to exploit a stronger spatiotemporal correlation within a continuous EPI-like readout. Within the  
30 readout, data are sampled at a much shorter timescale (submillisecond), so only minimal phase accumulation  
31 and signal decay will occur, resulting in a stronger temporal correlation that can increase the ability to recover  
32 highly undersampled data. In addition, it better takes advantage of the spatial information from multi-channel  
33 coils by employing a novel spatiotemporal encoding strategy within the readout, therefore allowing high  
34 acceleration. The continuous EPTI readout enables high sampling efficiency with minimal dead time, while the  
35 time-resolving approach across the readout eliminates the undesirable image distortion and blurring common in  
36 the conventional EPI (Mansfield, 1977), providing a series of high quality multi-contrast images sampled at

1 small time interval ( $\sim 1$  ms) that can continuously track the signal evolution to fit quantitative parameters. We  
2 have demonstrated efficient whole brain  $T_2$  and  $T_2^*$  mapping using a GE-SE EPTI at 1.1-mm inplane resolution  
3 within 28s in our previous work (Wang et al., 2019a).

4 Here, in pursuit of a significant further increase in acceleration capability, 3D-EPTI has been developed.  
5 3D-EPTI extends the spatiotemporal EPTI encoding from 2D ( $k_y-t$ ) to 3D ( $k_y-k_z-t$ ), and develops a new data  
6 sampling strategy with a combined controlled- and incoherent-aliasing scheme. Data correlations at multiple  
7 timescales are exploited, both within and between the continuous readouts. Within readouts, a spatiotemporal  
8 encoding is designed with complementary sampling in a controlled-aliasing (Breuer et al., 2005; Breuer et al.,  
9 2006; Dong et al., 2019) (CAIPI) pattern in the  $k_y-k_z-t$  domain, which uses coil sensitivity information along  
10 both partition and phase encoding directions along with the temporal correction across echoes, and offers a  
11 remarkably higher acceleration capacity (e.g.,  $80\times$ ). Between readouts, a novel radial-block encoding is  
12 developed to exploit data correlation in a longer timescale based on the compressed sensing theory (Lustig et  
13 al., 2007). The radial-block sampling creates incoherent aliasing along time that can be well excluded from the  
14 coherent signal evolutions, therefore provides another  $10\times$  acceleration. The combination of spatiotemporal  
15 CAIPI and radial-block undersampling offers a remarkable  $\sim 800\times$  acceleration in the spatiotemporal domain.

16 The harmonious integration of the continuous readout and the novel intra- and inter-readout spatiotemporal  
17 encoding in 3D-EPTI provides unique datasets that allow us to time-resolve thousands of multi-contrast 3D  
18 images by enforcing the spatiotemporal correlation in the reconstruction process. While this acquisition scheme  
19 can be applied or adapted to any sequence or other types of readouts to accurately track the signal evolution and  
20 to measure a variety of quantitative parameters, this work employs specific sequence to simultaneously obtain  
21 MR relaxation time constants  $T_1$ ,  $T_2$ ,  $T_2^*$  as well as RF field inhomogeneity ( $B_1^+$ ) and proton density (PD). We  
22 demonstrated the ability of 3D-EPTI to acquire high-quality whole-brain multi-parametric maps at isotropic  
23 1.5-mm in 1 minute or at isotropic 1-mm in 3 minutes with high repeatability and reliability. An isotropic 0.7-  
24 mm 3D-EPTI protocol was also developed to allow, for the first time, the examination of simultaneously  
25 acquired  $T_1$ ,  $T_2$ , and  $T_2^*$  in less than 10 minutes to help better investigate the intra-cortical architecture.

## 26 **2. Material and Methods**

### 27 *2.1. 3D-EPTI acquisition*

28 Figure 1 illustrates the 3D-EPTI acquisition. An inversion-recovery gradient echo (IR-GE) and a variable-  
29 flip-angle gradient-and-spin-echo (Feinberg and Oshio, 1991; Oshio and Feinberg, 1991) (VFA-GRASE)  
30 sequence (Fig. 1a) were chosen and carefully optimized to provide signal evolutions that are sensitive to  $T_1$ ,  $T_2$ ,  
31 and  $T_2^*$  relaxations (Fig. 1b). After each RF excitation, a 3D-EPTI readout is acquired, which continuously  
32 captures the temporal signal evolution with efficient bipolar gradient. To resolve images within the readout with  
33 high acceleration, a spatiotemporal CAIPI encoding is employed in a 4D spatiotemporal ( $k_x-k_y-k_z-t$ ) domain (Fig.  
34 1d, the readout dimension  $k_x$  is fully-sampled and therefore omitted in the illustration). At each time point within  
35 the readout, a particular phase and partition position ( $k_y-k_z$ ) is acquired that is interleaved to its neighboring time  
36 points in a ‘controlled-aliasing’ pattern. Across a slightly longer timescale, two complementary CAIPI patterns

1 are interleaved across echoes (orange and green points in Fig. 1d, different ‘echo sections’) to provide more  
 2 independent  $k$ -space sampling locations, which has been shown to further improve the reconstruction  
 3 performance at high acceleration rates (Dong et al., 2020). Each 3D-EPTI readout covers a relatively small  
 4 block in  $k_y$ - $k_z$ - $t$  space to ensure that the neighboring  $k_y$ - $k_z$  samplings are close in time. The CAIPI pattern, the  
 5 complementary sampling across echoes, and the proximity in time together result in high spatiotemporal  
 6 correlation and allow effective use of the available coil sensitivity information. Therefore, the highly-  
 7 undersampled data (e.g., undersampling rate =  $80\times$ ) at each time point can be well reconstructed, resolving a  
 8 series images across the readout at a submillisecond time interval (Fig. 1d, left).

9 In each repetition time (TR), multiple  $k$ - $t$  blocks can be acquired across multiple readouts after different  
 10 excitations (Fig. 1c, blocks in the same color are acquired in the same TR). To quickly encode the 4D  $k$ - $t$  space  
 11 using a small number of TRs, a golden-angle radial-block Cartesian sampling is employed across the readouts.  
 12 Specifically, the blocks acquired after the same excitation in different TRs form a diagonal radial blade in the  
 13  $k_y$ - $k_z$  space, with different blade angulations across different readouts. This was developed to create a favorable  
 14 spatiotemporal incoherent aliasing across the readouts that is well suited for constrained reconstruction, which  
 15 permits a further  $\sim 10\times$  acceleration through acquiring only a few blades for each readout instead of the full  $k_y$ -  
 16  $k_z$  sampling.

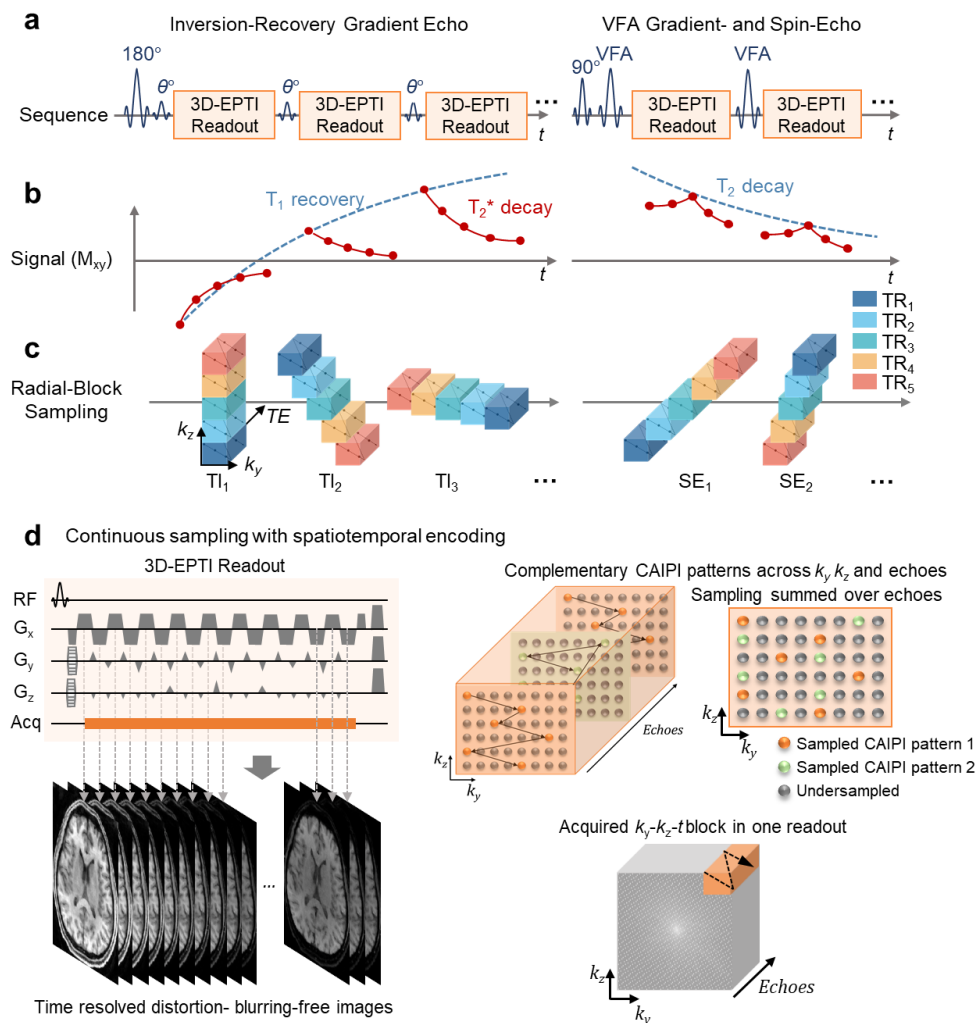

1 Figure 1. Illustration of the 3D-EPTI acquisition. **a**, The sequence diagrams of the inversion-recovery gradient-echo (IR-GE)  
 2 and the variable-flip-angle gradient and spin-echo (VFA-GRASE) sequences with 3D-EPTI readouts at different inversion  
 3 times (TI) and spin-echoes (SE). **b**, The designed sequence provides signal evolutions with high sensitivity to  $T_1$ ,  $T_2$  and  $T_2^*$   
 4 relaxation time constants, which can be continuously tracked by the 3D-EPTI readouts. **c**, Instead of acquiring the full  $k_y$ - $k_z$   
 5 space at every TI or SE, a radial-block Cartesian sampling pattern is utilized to quickly sample the  $k$ - $t$  space in a small  
 6 number of TRs. At each TI or SE, the  $k_y$ - $k_z$ - $t$  blocks acquired in different TRs (color-coded) form a radial blade with different  
 7 angulations to create spatiotemporal incoherent aliasing for constrained reconstruction and permit  $\sim 10\times$  acceleration. **d**,  
 8 Details of the continuous bipolar readout with an optimized spatiotemporal CAIPI encoding used to efficiently cover a  $k_y$ - $k_z$ -  
 9  $t$  block per 3D-EPTI readout. The neighboring data points are acquired close in time to create strong temporal correlation.  
 10 Two CAIPI patterns (orange and green points) are utilized in a complementary fashion at a longer timescale in different echo  
 11 sections. The combination of spatiotemporal CAIPI and radial-block undersampling offers a remarkable  $\sim 800\times$  acceleration  
 12 in the spatiotemporal domain. Note that the readout ( $k_x$ ) dimension is fully-sampled and therefore omitted in the illustration.

## 13 2.2. Image reconstruction

14 The acquired highly undersampled data, with carefully designed spatiotemporal encoding patterns, will  
 15 then be reconstructed by a low-rank subspace reconstruction (Dong et al., 2020; Guo et al., 2021; He et al.,  
 16 2016; Lam and Liang, 2014; Liang, 2007; Meng et al., 2021; Tamir et al., 2017; Zhao et al., 2015), tailored  
 17 specifically to 3D-EPTI to time-resolve thousands of multi-contrast images (Fig. 2). The low-rank subspace  
 18 method was chosen for use based on its superior ability to improve the conditioning in the reconstruction by  
 19 utilizing the low-rank prior information of the signal evolution, therefore achieving high image SNR.

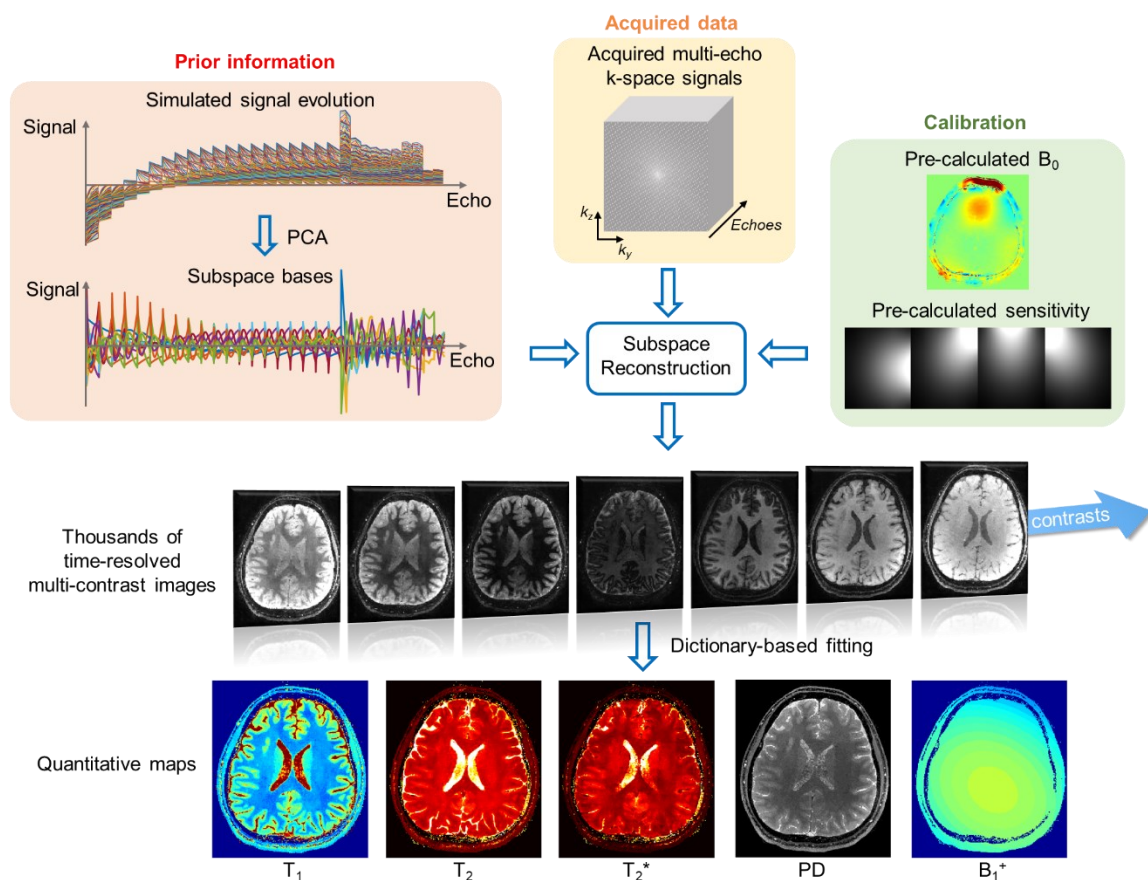

20  
 21 Figure 2. Illustration of the reconstruction framework of 3D-EPTI using the low-rank subspace method. The signal evolutions



1 can be represented by a linear combination of several subspace temporal bases, therefore reducing the number of  
2 unknowns from thousands of images to a few coefficients of the subspace bases. The bases are extracted from the  
3 simulated signal space using principal component analysis (PCA). The subspace reconstruction is performed by integrating  
4 the information from a highly-undersampled spatiotemporal dataset,  $B_0$  phase evolution and coil sensitivity maps obtained  
5 via a calibration dataset, and the subspace bases. After the reconstruction, thousands of multi-contrast images can be  
6 obtained without distortion and blurring, from which multiple quantitative parameters including  $T_1$ ,  $T_2$ ,  $T_2^*$ , PD, and  $B_1^+$  can  
7 be estimated through dictionary matching.

8 At first, a large number of temporal signal evolutions are simulated using the Extended Phase Graphs (EPG)  
9 approach (Weigel, 2015), each contains  $N_t$  time points. A wide range of quantitative parameters were used to  
10 exhaust all possibilities of interest (e.g.,  $T_1$ : 400 ms to 5000 ms,  $T_2$ : 10 ms to 500 ms,  $T_2^*$ : 10 ms to 500 ms,  $B_1^+$   
11 factor: 0.75 to 1.25). Second,  $N_b$  subspace basis vectors  $\phi \in \mathbb{C}^{N_t \times N_b}$  are extracted from these simulated signals  
12 by using principal component analysis (PCA). In this study, 12 bases were selected that can approximate the  
13 simulated signals with an error smaller than 0.2%. Then, the full time series of  $N_v$  spatial voxels can be  
14 represented by  $\phi c$ , where  $c \in \mathbb{C}^{N_b \times N_v}$  represents the coefficient maps of the subspace bases that can be  
15 estimated by solving:

$$\min_c \|UFSP\phi c - y\|_2^2 + \lambda R(c) \quad (1)$$

16 where  $P \in \mathbb{C}^{N_v \times N_t}$  contains the phase evolutions across the time-series images including the background and  $B_0$   
17 inhomogeneity-induced phases,  $S \in \mathbb{C}^{N_v \times N_c}$  denotes the coil sensitivity of a  $N_c$ -channel receiver coil,  $F$  is the  
18 Fourier transform operator,  $U$  is the undersampling mask, and  $y$  represents the acquired  $k$ -space data. The phase  
19 map  $P$  and sensitivity map  $S$  can be obtained from a short low-resolution calibration pre-scan. A locally low-  
20 rank (LLR) regularization  $R(c)$  is applied on coefficient maps with a control parameter  $\lambda$  to further improve the  
21 conditioning. Since the number of unknowns in the optimization problem is significantly reduced from  
22 thousands of images to a few coefficient maps, the subspace method can achieve accurate image reconstruction  
23 for 3D-EPTI at high accelerations.

24 After reconstruction, the quantitative values can be obtained by matching the signal evolution with a pre-  
25 calculated dictionary. The dictionary is generated using the EPG approach with the same parameter range used  
26 in the basis generation. After dictionary matching, the estimated  $B_1^+$  maps are fitted by a 2<sup>nd</sup>-order polynomial  
27 function in the 3D spatial domain, with an assumption that  $B_1^+$  fields vary smoothly in the spatial domain, which  
28 are then fed back into the dictionary matching to obtain more accurate quantitative parameters.

### 30 2.3. *In-vivo experiments and acquisition parameters*

31 All data were acquired on a Siemens Prisma 3T scanner with a 32-channel head coil (Siemens Healthineers,  
32 Erlangen, Germany). Informed consent was collected from all healthy volunteers before scanning, with an  
33 institutionally approved protocol.

34 The details of the pulse sequence used in our experiments are described here. In the IR-GE sequence, an  
35 adiabatic inversion pulse was applied, followed by 20 excitation pulses with a small flip angle (FA) of 30°. In  
36 the VFA-GRASE sequence, 10 variable-flip-angle refocusing pulses were applied after the 90° pulse with FAs

1 of 122°, 58°, 44°, 41°, 41°, 46°, 158°, 189°, 43°, 30°. The FAs and the timing of the pulse sequence were chosen  
2 based on the results of an optimization considering both the signal amplitude and the differentiability between  
3 tissues. All the excitation and refocusing RF pulses in the IR-GE and GRASE sequences were non-selective  
4 with short pulse durations (0.5 ms for excitation and 1 ms for refocusing), resulting in shorter achievable starting  
5 TE and sampling interval. Readout gradient was applied along the Head-Foot (HF) direction to avoid signal  
6 wrap from the non-selective excitation. Spectrally-selective fat saturation was applied before excitation.

7 To evaluate the repeatability of 3D-EPTI, a scan-rescan assessment was performed on 5 healthy volunteers  
8 using a 3-minute 1-mm 3D-EPTI protocol, where the subjects were taken out of the scanner and repositioned  
9 between the two scans. The data were acquired with the following parameters: FOV = 220 × 176 × 210 mm<sup>3</sup>  
10 (AP-LR-HF), matrix size = 230 × 184 × 210, spatial resolution = 0.96 × 0.96 × 1 mm<sup>3</sup>, echo spacing = 0.93 ms,  
11 TR of IR-GE = 2600 ms, TR of GRASE = 800 ms, block size ( $k_y \times k_z$ ) = 8 × 10 (80× acceleration, see  
12 Supplementary Fig. 1a for encoding pattern). There were 20 readouts in IR-GE, each containing 48 echoes, and  
13 10 readouts in GRASE, each containing 39 echoes. 2 radial lines were acquired for the IR-GE sequence in 45  
14 TRs (instead of 23×23=529 TRs without radial-block acceleration), and 3 radial lines in 65 TRs were acquired  
15 for the GRASE sequence (Supplementary Fig. 2 top row). More lines were acquired in GRASE to compensate  
16 for the fewer number of readouts to encode the  $k$ - $t$  space. The total acquisition time was ~3 minutes, including  
17 117 seconds for IR-GE, 54 seconds for GRASE, and a 12-second calibration scan. The  $k$ - $t$  calibration scan was  
18 acquired to estimate the  $B_0$  and coil sensitivity using a GE sequence with bipolar readouts with the following  
19 parameters: matrix size = 42 × 32 × 210, number of echoes = 9, TR = 24 ms. The  $k$ -space center (8 × 8) was  
20 fully-sampled and the rest of  $k$ -space was undersampled along  $k_y$  and  $k_z$  by a factor of 2 × 2. GRAPPA (Griswold  
21 et al., 2002) was used to reconstruct the missing data points in the calibration data. The calibration scan for all  
22 of the following acquisitions used the same matrix size along  $k_y$  and  $k_z$  with the same acceleration factor.

23 Two additional whole-brain protocols at different resolutions were also acquired. i) A fast 1-min 1.5-mm  
24 protocol with parameters: FOV = 218 × 173 × 230 mm<sup>3</sup> (AP-LR-HF), matrix size = 150 × 120 × 154, spatial  
25 resolution = 1.45 × 1.44 × 1.49 mm<sup>3</sup>, echo spacing = 0.72 ms, TR of IR-GE = 1900 ms, TR of GRASE = 600  
26 ms, block size ( $k_y \times k_z$ ) = 8 × 10 (80× acceleration, see Supplementary Fig. 1a for encoding pattern), each readout  
27 contained 53 echoes in IR-GE, and 39 echoes in GRASE. 3 radial lines with a reduction factor of 2 along the  
28 radial direction, equivalent to 1.5 lines, were acquired in 23 TRs (instead of 15×15=225 TRs), and 2 radial lines  
29 were acquired for GRASE in 29 TRs (Supplementary Fig. 2 middle row). The total acquisition time was ~ 1  
30 minute, including 44 s for IR-GE and 17 s for GRASE. The 1.5-mm calibration scan took 10 seconds with a TR  
31 = 20 ms. ii) A high resolution 9-min 0.7-mm protocol with acquisition parameters: FOV = 224 × 176.4 × 224  
32 mm<sup>3</sup> (AP-LR-HF), matrix size = 328 × 246 × 322, spatial resolution = 0.68 × 0.72 × 0.70 mm<sup>3</sup>, echo spacing =  
33 1.2 ms, TR of IR-GE = 2600 ms, TR of GRASE = 800 ms, block size ( $k_y \times k_z$ ) = 8 × 6 (48× acceleration, see  
34 Supplementary Fig. 1b for encoding pattern), each readout contained 42 echoes in IR-GE, and 33 echoes in  
35 GRASE. 4 radial lines were acquired for both IR-GE and GRASE in a total of 161 TRs (instead of 41×41=1681  
36 TRs) to provide sufficient sampling for higher spatial resolution (Supplementary Fig. 2 bottom row). The total  
37 acquisition time was ~ 9 minutes, including 7 min for IR-GE and 2 min for GRASE. The calibration scan took



1 12 seconds with 7 echoes and a TR of 24 ms.

2 To further validate 3D-EPTI's reliability, a comparison study between quantitative parameters provided by  
3 3D-EPTI and those from lengthy standard acquisition methods was conducted both in phantom and *in vivo*. The  
4 standard acquisition includes a 2D IR-SE sequence for  $T_1$  mapping, a 2D single-echo SE sequence for  $T_2$   
5 mapping, and a 3D multi-echo GRE sequence for  $T_2^*$  mapping. In the phantom experiment, the acquisition  
6 parameters of the 2D IR-SE sequence were: FOV =  $256 \times 256 \text{ mm}^2$ , in-plane resolution =  $1 \times 1 \text{ mm}^2$ , slice  
7 thickness = 3 mm, number of slices = 9, acceleration factor along  $k_y = 2$ , TR = 8000 ms, TIs = 100, 200, 400,  
8 800, 1600, 3200 ms. The 2D single-echo SE sequence acquired 6 echo times (25, 50, 75, 100, 150, 200 ms)  
9 with a TR of 3000 ms, and used the same FOV, resolution, and acceleration as the IR-SE. The 3D multi-echo  
10 GRE sequence used for the  $T_2^*$  mapping was acquired with a FOV of  $186 \times 176 \times 224 \text{ mm}^3$  at 1-mm isotropic  
11 resolution. Seven echo times (5, 10, 15, 25, 35, 45, 60 ms) were acquired with an acceleration factor of  $2 \times 2$   
12 ( $k_y \times k_z$ ). The total acquisition time for the phantom scan was about 1.5 hours, including 30 minutes for IR-GE,  
13 50 minutes for single-echo SE, and 12 minutes for 3D GRE. The same sequences were used for the in-vivo test,  
14 but at a lower resolution of  $2 \times 2 \text{ mm}^2$  in the IR-SE and single-echo SE sequences to reduce the scan time and  
15 mitigate potential motion-induced artifacts. Most of the other parameters were kept the same as the phantom  
16 scan, except for: the number of slices = 19 for IR-SE and single-echo SE; TEs of single-echo SE = 25, 50, 75,  
17 100, 140, 180 ms; a higher acceleration factor along  $k_y = 3$  for IR-GE and single-echo SE; and FOV of 3D-GRE  
18 =  $216 \times 176 \times 210 \text{ mm}^3$ . Even with the lower resolution and higher acceleration, the total scan time was still  
19 about 53 minutes, including 27 minutes for single-echo SE, 14 minutes for IR-SE, and 12 minutes for GRE.

#### 20 2.4. Image processing and analysis

21 Data reconstructions were performed in MATLAB using a Linux workstation (CPU: Intel Xeon, 3.00GHz,  
22 24 Cores; RAM: 512 GB; GPU: Quadro RTX 5000, 16 GB memory). The subspace reconstruction was solved  
23 by the alternating direction method of multipliers (ADMM) algorithm (Boyd et al., 2011) implemented in the  
24 Berkeley Advanced Reconstruction Toolbox (BART) (Tamir et al., 2016; Uecker et al., 2015).

25 In the test-retest experiment, the quantitative maps from the two scans (3-min 1-mm protocol) were first  
26 registered using FSL FLIRT (Jenkinson et al., 2002; Jenkinson et al., 2012; Jenkinson and Smith, 2001). Then,  
27 the averaged  $R_1$  maps of each subject were used for Freesurfer (Desikan et al., 2006; Fischl, 2012; Fischl et al.,  
28 2002) segmentation, which resulted in 165 Region Of Interests (ROI) in cortical, subcortical, white matter and  
29 cerebellum regions, after removing CSF regions and ROIs smaller than 50 voxels. Two-sided *t*-tests and  
30 Pearson's correlation coefficients were used in the repeatability analysis. Surface-based cortical reconstruction  
31 was performed using Freesurfer (Desikan et al., 2006; Fischl, 2012; Fischl et al., 2002) on the  $R_1$  maps separately  
32 for each subject and for each scan (9-min 0.7-mm protocol). 9 equi-volume (Wahnert et al., 2014; Wahnert et  
33 al., 2016) cortical layers were reconstructed, and applied to all quantitative maps to investigate their distribution  
34 across different cortical depths. These maps were sampled onto the average subject space with a 2-mm Gaussian  
35 surface smoothing for final analysis.

1 Synthetic images were synthesized from the calculated quantitative maps based on signal equations of  
2 specific sequences. To optimize visualization between two types of tissue of interest, a spectrum of contrast  
3 difference was obtained using a range of acquisition parameters. The mean value of the synthesized image  
4 intensity of the target tissues was used to calculate the contrast difference. The tissue can be identified by the  
5 acquired quantitative maps, for example, a threshold-based segmentation on  $T_1$  map was performed here  
6 to generate masks for gray matter, white matter and CSF.

### 7 3. Results

#### 8 3.1. Simultaneous $T_1$ , $T_2$ , and $T_2^*$ mapping in 3-minutes at 1-mm isotropic resolution.

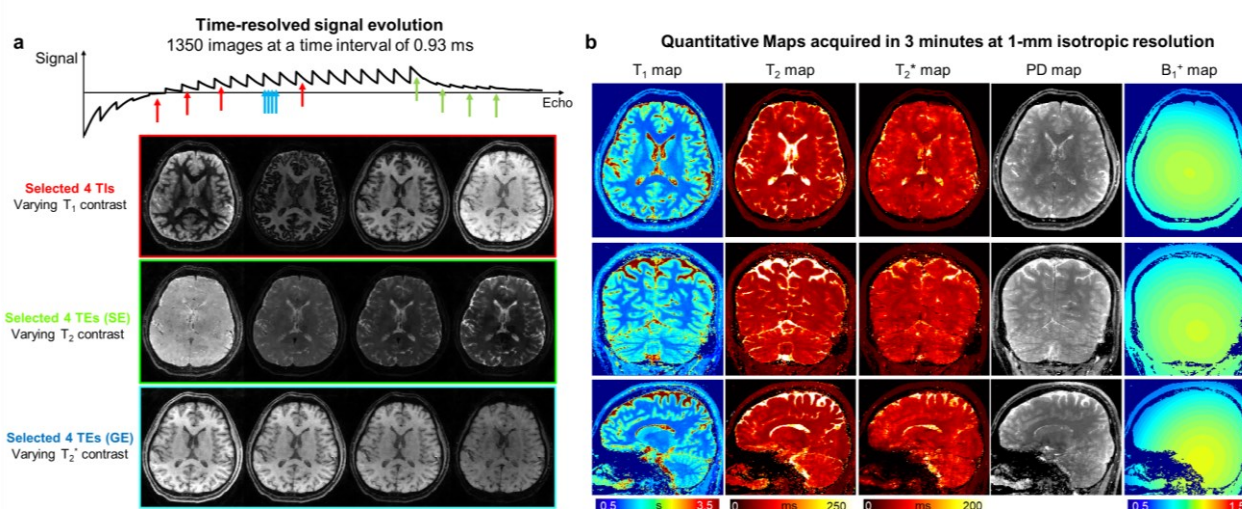

9  
10 Figure 3. Simultaneous whole-brain  $T_1$ ,  $T_2$  and  $T_2^*$  mapping at 1-mm isotropic resolution in 3 minutes acquired by 3D-EPTI.  
11 **a**, Representative reconstructed multi-contrast images with different  $T_1$ ,  $T_2$ , and  $T_2^*$  weightings selected from the 1350  
12 resolved images. **b**, High-resolution quantitative maps estimated from the multi-contrast images, including  $T_1$ ,  $T_2$ ,  $T_2^*$ , PD  
13 and  $B_1^+$ , shown in three orthogonal views.

14 Figure 3 demonstrates an example dataset acquired by 3D-EPTI at 1-mm isotropic resolution with whole  
15 brain coverage in 3 minutes, resulting in a total of 1350 multi-contrast images resolved at a time interval as  
16 short as 0.93 ms (an echo-spacing). Representative reconstructed images with different  $T_1$ ,  $T_2$ ,  $T_2^*$  contrasts  
17 illustrate the high quality in the reconstruction that can be achieved from a highly undersampled dataset by fully  
18 exploiting the intra- and inter-readout spatiotemporal correlations (Fig. 3a). The resultant quantitative parameter  
19  $T_1$ ,  $T_2$ ,  $T_2^*$ , PD maps show high image SNR and resolution, without image distortions and noticeable aliasing  
20 artifacts (Fig. 3b). In addition to these quantitative parameters, 3D-EPTI also estimates the  $B_1^+$  field, therefore  
21 achieves improved accuracy for quantification without the need of an additional scan for  $B_1^+$ . These multi-  
22 parametric maps acquired in a single scan are also perfectly aligned without the need for co-registration. The  
23 accuracy of the quantitative estimates, including  $T_1$ ,  $T_2$ ,  $T_2^*$ , PD and  $B_1^+$ , was also tested through a simulation  
24 study with gold standard reference parameter maps, where low errors were observed for all parameters as shown  
25 in Supplementary Fig. 3.

1 3.2. Characterization of the repeatability and reliability for  $T_1$ ,  $T_2$ , and  $T_2^*$  mapping.

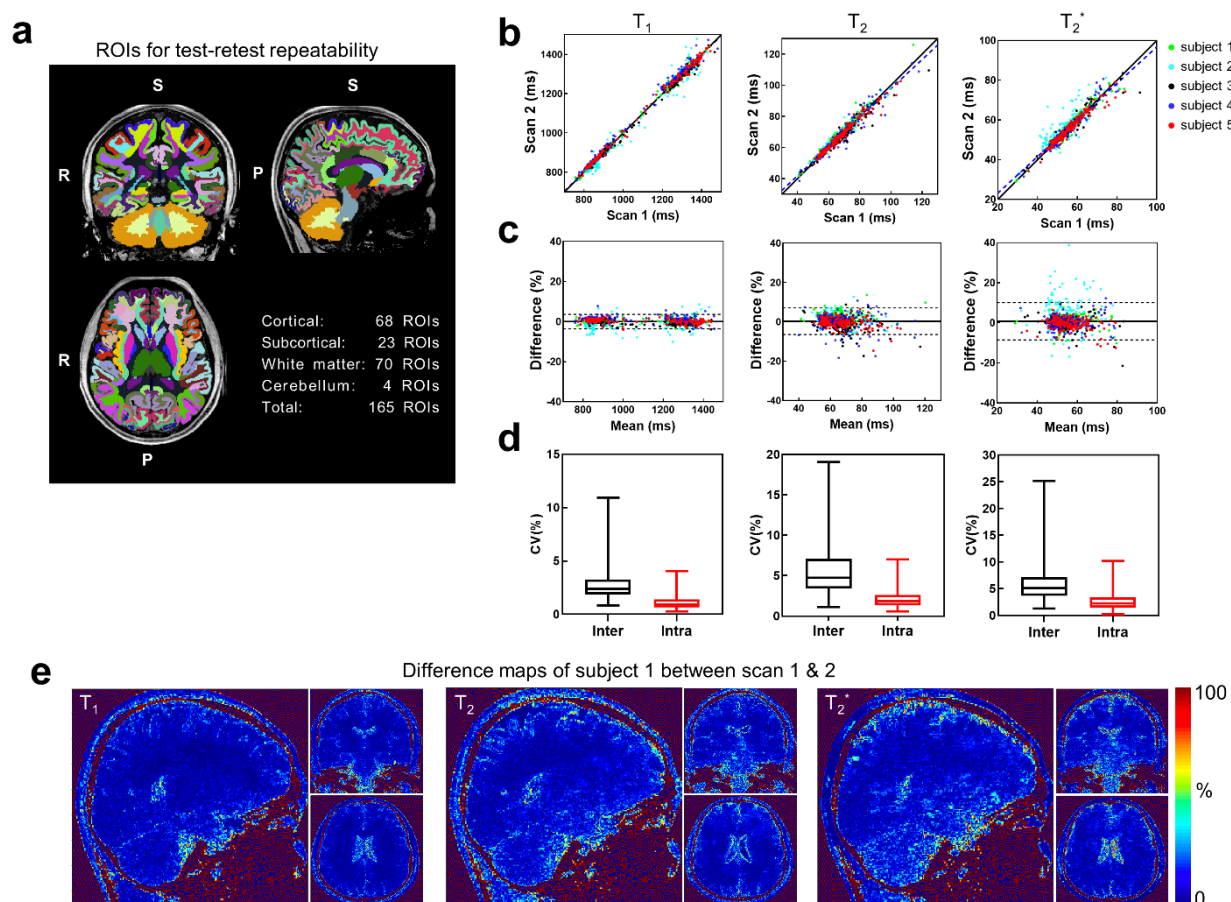

2  
3 Figure 4. Repeatability test of 3D-EPTI for simultaneous  $T_1$ ,  $T_2$  and  $T_2^*$  mapping using the 3-minute 1-mm protocol. **a**, 3D  
4 volumes are segmented into 165 ROIs covering the whole-brain area. **b**, Scatter plots of the test-retest  $T_1$ ,  $T_2$ ,  $T_2^*$  values in  
5 the 165 ROIs measured from 5 subjects, shown along with the identity line (solid) and the regressed line (dashed). **c**, Bland-  
6 Altman plots of the test-retest quantitative parameters. Solid lines show the mean differences or the estimated biases, while  
7 the dotted lines show the 95% limits of agreements. **d**, Box-plots of the coefficient of variation (COV) between (inter) and  
8 within (intra) subjects with whiskers showing minimum and maximum data points. **e**, The percentage difference maps in one  
9 of the subjects that shows the spatial distribution of the test-retest variations for the 3 parameters.

10 Quantitative repeatability is crucial for monitoring and characterization of brain tissues over time and  
11 among populations. To evaluate the repeatability of 3D-EPTI, the scan-rescan assessment performed on 5  
12 healthy volunteers using the 3-minute 1-mm protocol is shown in Fig. 4. An example of the auto-segmented  
13 Freesurfer ROIs used in the study is demonstrated in Fig. 4a. High correlations and small differences were  
14 measured between the two scans for all three parameters as shown in Fig. 4b and 4c. Specifically, the  $T_1$  values  
15 from the first and the second scans are highly correlated with a positive Pearson's correlation coefficient (PCC)  
16 of 0.996 ( $P < 0.0001$ ). Bland Altman analysis revealed no significant difference ( $P = 0.821$ , two-tailed  $t$ -test)  
17 between the two measurements. The  $T_2$  values of the two scans show a high positive correlation (PCC = 0.974,  
18  $P < 0.0001$ ) with a small difference of 0.28% ( $P = 0.017$ ), and the  $T_2^*$  values also show a high positive correlation  
19 (PCC = 0.938,  $P < 0.0001$ ) and a small difference of 0.80% ( $P < 0.0001$ ). The scan-rescan difference maps (Fig.  
20 4e) show a low level of differences and a relative homogeneous distribution in the gray and white matter areas

1 of interest, while large differences are mainly observed in the CSF regions, which could be attributed to the high  
2 physiological noise in these regions.

3 The intra-subject variability between test-retest scans and inter-subject variability among the five  
4 volunteers were also evaluated and compared using coefficient of variation (COV). Figure 4d shows the  
5 distribution of the intra-subject and inter-subject COVs across all ROIs in box plots with whiskers from  
6 minimum to maximum data points. Small intra-subject variability was observed with a median COV at 0.93%,  
7 1.88% and 2.27% for  $T_1$ ,  $T_2$  and  $T_2^*$  respectively. The inter-subject COVs were also measured to be at a low  
8 level, with median COVs of 2.39%, 4.75%, 5.09%, which are higher than the intra-subject measurements as  
9 expected. The overall low level of COVs demonstrates the high level of repeatability of the 3D-EPTI  
10 quantifications, while the expected differences between intra- and inter-subject suggest the potential ability of  
11 3D-EPTI in capturing individual differences. The  $T_2^*$  values show the largest variability that could be reflective  
12 of the variability in the head position between the scan and rescan acquisitions, where previous findings have  
13 demonstrated variability in  $T_2^*$  values as a function of head orientation relative to the main field (Cohen-Adad  
14 et al., 2012). The repeatability of  $B_1^+$  mapping was also evaluated where consistent measurements were obtained  
15 across three scans at different spatial resolutions for the same subject as shown in Supplementary Fig. 4.

16 To further validate 3D-EPTI's reliability, a comparison between quantitative parameters provided by 3D-  
17 EPTI and those from standard acquisition methods was conducted *in vivo*. The well-established standard  
18 methods provide high quality quantitative parameters at a cost of impractically long acquisition time and  
19 therefore a higher level of susceptibility to motion induced artifacts. To mitigate this issue in our comparison,  
20 we reduced the spatial resolution ( $2 \times 2 \times 3 \text{ mm}^3$  for  $T_1$  and  $T_2$ ) as well as the slice coverage of the standard  
21 acquisitions to keep them to an acceptable total acquisition time of 53 minutes. For 3D-EPTI, a single 3-minute  
22 scan at 1-mm isotropic resolution with whole brain coverage was used to obtain all the quantitative estimates.  
23 ROI analysis was performed in 14 manually selected ROIs that were contained within the slice coverage of the  
24 standard 2D acquisitions. As shown in Fig. 5,  $T_1$  measurements of 3D-EPTI and the standard method show high  
25 positive correlation (PCC = 0.972,  $P < 0.0001$ ), with a bias of -7.23% ( $P < 0.0001$ ). Similarly,  $T_2$  measurements  
26 also show high positive correlation (PCC = 0.790,  $P = 0.0008$ ) with no significant bias ( $P = 0.1351$ ). Lastly,  $T_2^*$   
27 values are also highly correlated (PCC = 0.948,  $p < 0.0001$ ) with a small bias of 4.68% ( $P = 0.0137$ ). In addition  
28 to the in-vivo validation, a phantom experiment was also performed where the quantitative measurements from  
29 3D-EPTI are in good agreement with the standard methods (Supplementary Fig. 5).



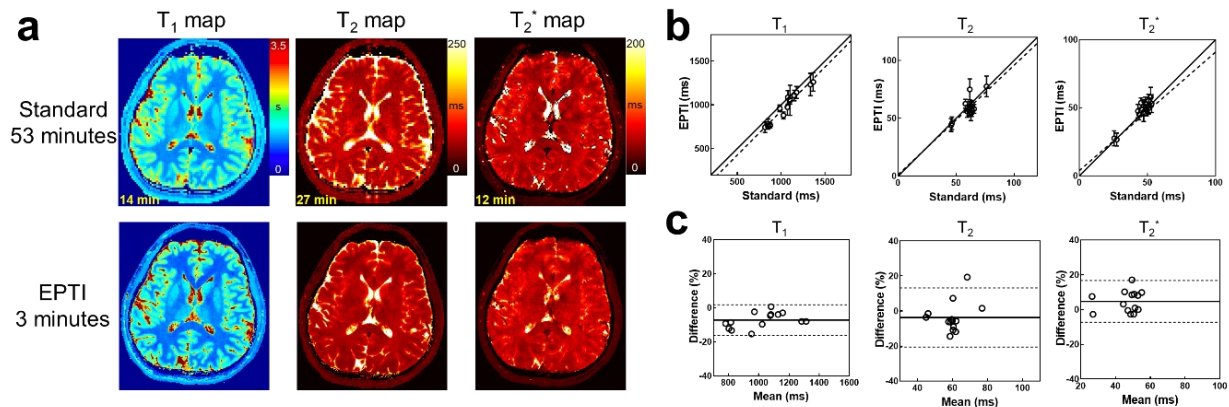

1  
2 Figure 5. Comparison of the quantitative measurements obtained using 3D-EPTI vs. lengthy standard acquisitions *in vivo*.  
3 **a**, Quantitative maps acquired by the standard methods and 3D-EPTI. **b**, Scatter plots of the quantitative values from 14  
4 selected ROIs, shown along with the identity line (solid) and the regressed line (dashed). **c**, Bland-Altman plots of the same  
5 data with the mean differences or the estimated biases (solid lines) and the 95% limits of agreements (dotted lines).

### 6 3.3. Ultra-fast 1-min scan and submillimeter mapping enabled by the high efficiency.

7 In addition to the 3-minute 3D-EPTI protocol at 1-mm isotropic resolution, two additional whole-brain  
8 protocols at different resolutions were developed to showcase the high efficiency of 3D-EPTI.

9 First, an ultra-fast 1-minute protocol at 1.5-mm isotropic resolution was developed to obtain high quality  
10 quantitative maps as shown in Fig. 6 ( $T_1$  map) and Supplementary Fig. 6 ( $T_2$  and  $T_2^*$  maps). A one-minute ultra-  
11 fast scan has been an alluring target for the MRI research community, but to our knowledge, no study so far has  
12 been able to obtain whole brain quantitative parameters in a scan as short as 1 minute at a reasonable isotropic  
13 spatial resolution. The 1-minute multi-parametric scan provided by 3D-EPTI could help fulfill this important  
14 unmet need. The quick 3D-EPTI scan could potentially reduce the chance of involuntary movements, a major  
15 source of image artifacts in MRI, particularly in less compliant clinical patients (e.g., pediatric patients), as well  
16 as improve patient throughput and reduce costly re-scan, patients called backs (Andre et al., 2015) and the need  
17 of harmful anesthesia (Ing et al., 2012).



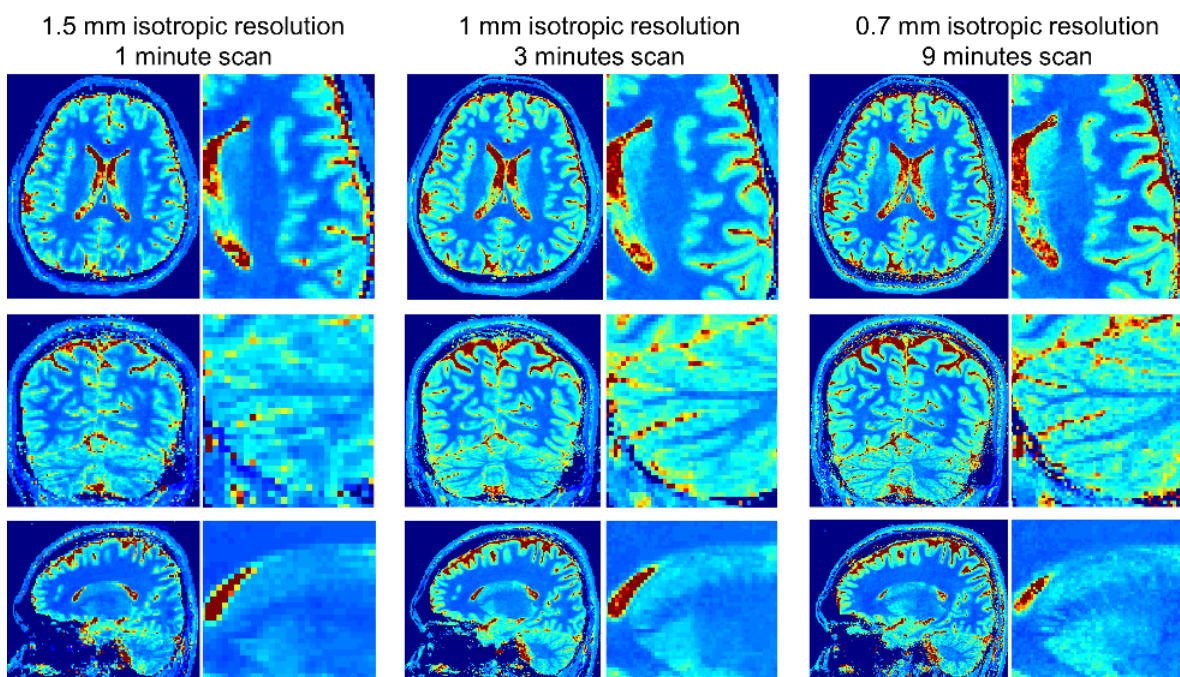

1  
2 Figure 6. Example  $T_1$  maps with zoomed-in areas provided by 3D-EPTI protocols at different spatial resolutions: 1-minute  
3 scan at 1.5-mm isotropic resolution, 3-minute scan at 1-mm isotropic resolution, and 9-minutes scan at 0.7-mm isotropic  
4 resolution.

5 Another protocol has also been developed for the acquisition of 0.7-mm isotropic resolution quantitative  
6 parameters in 9 minutes, to allow visualization and analysis of more detailed brain structures (Fig. 6, right  
7 column). This should be particularly helpful in studying the intra-cortical architecture of the human brain, where  
8 the thin cortex consists of multiple layers with different tissue properties, such as different levels of myelination  
9 or iron concentration (Carey et al., 2018; Haast et al., 2016; Lutti et al., 2014; Marques et al., 2017; Trampel et  
10 al., 2019; Waehnert et al., 2016; Warntjes et al., 2016). The high efficiency of 3D-EPTI enables for the first-  
11 time simultaneous acquisition of  $T_1$ ,  $T_2$ ,  $T_2^*$  at submillimeter resolution within a few minutes, and provides a  
12 new powerful tool to study cortical layer-dependent tissue properties.

13 Here, we explored the feasibility of using 3D-EPTI to assess intra-cortical structures of healthy volunteers,  
14 evaluated its inter-scan and inter-subject repeatability, and explored its potential to identify specific spatial  
15 features. Figure 7a shows the quantitative maps of all three parameters at different cortical depth from inner  
16 (proximate to white matter) to outer (proximate to CSF) surface of a healthy volunteer. Consistent profiles  
17 across layers can be observed with distinctly lower values in areas that are highly myelinated, such as motor,  
18 sensory, auditory, MT and visual cortex, which are in accordance with previous literatures (Carey et al., 2018;  
19 Glasser et al., 2014; Haast et al., 2016; Lutti et al., 2014; Marques et al., 2017). For all three relaxation  
20 parameters, there is a general increasing trend across cortical layers from inner to outer surface, potentially  
21 reflecting the decrease of myelin and iron contents from the white matter surface to the CSF surface that has  
22 been validated in histological studies (Annese et al., 2004). Figure 7b shows an example of such profile within  
23 a representative ROI in the motor cortex (BA 4a), where consistent profiles from 4 healthy volunteers (color-  
24 coded) across two repeated scans (solid and dashed lines) were plotted, showing high inter-scan (intra-subject)

1 and inter-subject repeatability. The high repeatability is also observed in all other representative ROIs as shown  
 2 in Fig 7d and 7e, quantified by both the root mean square errors (RMSEs) and the PCC, which assess the  
 3 differences and the similarities of the cortical profiles among subjects and between scans. The intra-subject  
 4 profiles were measured with low differences (median RMSEs for  $T_1$ ,  $T_2$ ,  $T_2^*$  at 20.36 ms, 1.84 ms and 2.94 ms)  
 5 and high correlations (median PCCs at 0.999, 0.999, 0.992). The inter-subject profiles showed higher variability  
 6 than intra-subject as expected, but still with low median RMSEs at 38.47 ms, 4.37 ms and 4.42 ms as well as  
 7 high median PCCs at 0.998, 0.995, 0.988 for  $T_1$ ,  $T_2$ ,  $T_2^*$  respectively.

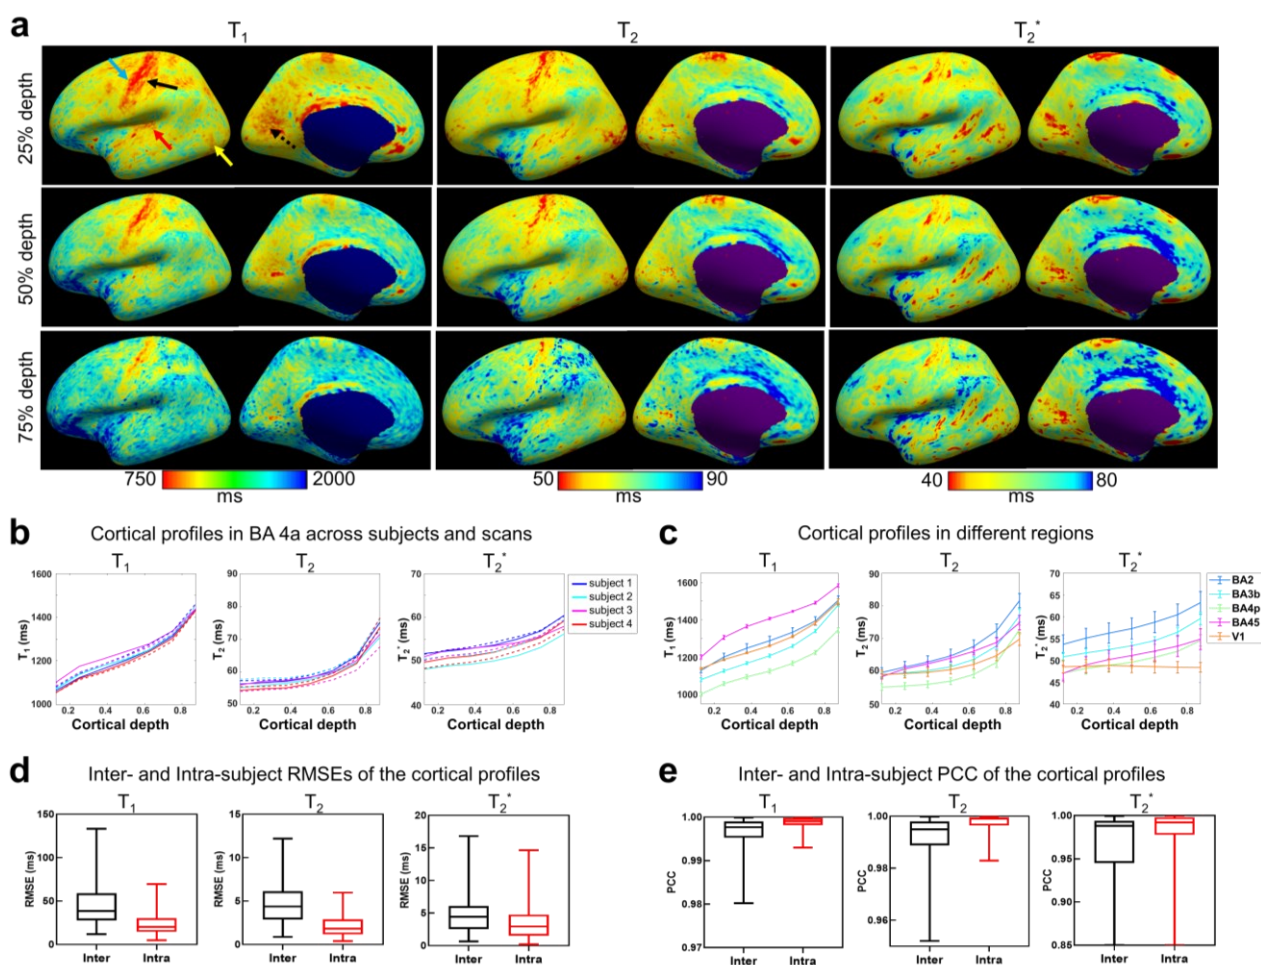

8  
 9 Figure 7. Surface-based cortical analysis of  $T_1$ ,  $T_2$  and  $T_2^*$  of 0.7-mm isotropic resolution 3D-EPTI data. **a**, Quantitative  
 10 parameters sampled at three different cortical depths (25%, 50%, 75%) shown on the reconstructed cortical surface. Lower  
 11 quantitative values were observed in highly-myelinated regions such as motor (blue arrow), somatosensory (black arrow),  
 12 auditory (red arrow), middle temporal visual area (yellow arrow) and visual cortex (dotted black arrow). **b**, Example of  
 13 quantitative values as a function of cortical depth in the BA 4a area of 4 subjects across 2 repeated scans (solid line: scan  
 14 1, dashed line: scan 2). **c**, Averaged quantitative values over the 2 scans across 4 subjects as a function of cortical depth in  
 15 5 representative ROIs. Error bars represent the standard deviations between the 4 subjects. **d**, Box plots of the root-mean-  
 16 square-errors (RMSEs) of the cortical profiles of the quantitative parameters calculated between (inter) and within (intra)  
 17 subjects. **e**, Box plots of Pearson correlation coefficients (PCCs) of the profiles calculated between (inter) and within (intra)  
 18 subjects.

19 Despite the remarkable consistency across scans and subjects, the cortical profiles differ across different  
 20 cortical regions. The average profiles in Fig. 7c revealed different slopes and global values in different ROIs.

1 The results provided by 3D-EPTI in a dramatically reduced scan time agree well with previous literatures  
2 investigating  $T_1$  or  $T_2^*$  cortical profiles (Carey et al., 2018; Marques et al., 2017; Waehnert et al., 2016). For  
3 example, highly myelinated areas such as the motor (BA 4p), and the sensory (BA 3b) areas have globally lower  
4  $T_1$  profiles than other areas. A relative flat  $T_2^*$  profile was observed in the visual cortex, which was also reported  
5 previously (Carey et al., 2018; Marques et al., 2017) and might be attributed to the highly myelinated middle  
6 layers and increasing susceptibility in the outer layers due to presence of blood vessels with a high level of iron.  
7 Previous studies investigating  $T_2$  profiles across cortical depths have been lacking due to the need for  
8 prohibitively long acquisitions. Using 3D-EPTI, different  $T_2$  profiles were also obtained in different ROIs,  
9 which could reflect differences in both myelin water content and iron composition and complement to the  
10 findings in  $T_1$  and  $T_2^*$ .

### 11 *3.4. High quality synthetic images*

12 Figure 8 demonstrated the contrast-synthesizing ability of 3D-EPTI using its co-registered quantitative  
13 maps in several examples, including the clinical routine contrasts (MPRAGE,  $T_2$ -FLAIR and  $T_2$ -weighted), and  
14 some advanced contrasts such as double inversion recovery (DIR) to provide superior cortical visualization  
15 (Calabrese et al., 2007; Wattjes et al., 2007). The high efficiency of 3D-EPTI allows us to achieve higher spatial  
16 resolution within clinical acceptable time, which significantly reduces the partial volume effects commonly  
17 observed in synthetic images (e.g., the 0.7-mm data shows minimal partial volume effects even in challenging  
18 FLAIR contrast compared to the 1-mm and 1.5-mm data). The high isotropic resolution of the 3D-EPTI  
19 protocols also renders it the flexibility of viewing the images in arbitrary orientations (Fig.8b). Using the  
20 quantitative parameters, the weighting of each of these contrasts is adjustable to provide optimal visualization  
21 for the tissue of interest without the need to re-scan the subject. For instance, the contrast-determining  
22 parameters of an IR-SE sequence (FLAIR), TI and TE, can be freely adjusted across a wide range, resulting in  
23 a spectrum of possible contrasts between tissues (Fig. 8c). From the spectrum, a particular set of parameters can  
24 be selected for final image synthesis, such as the ones that offer the maximum white-grey or CSF-gray contrast.



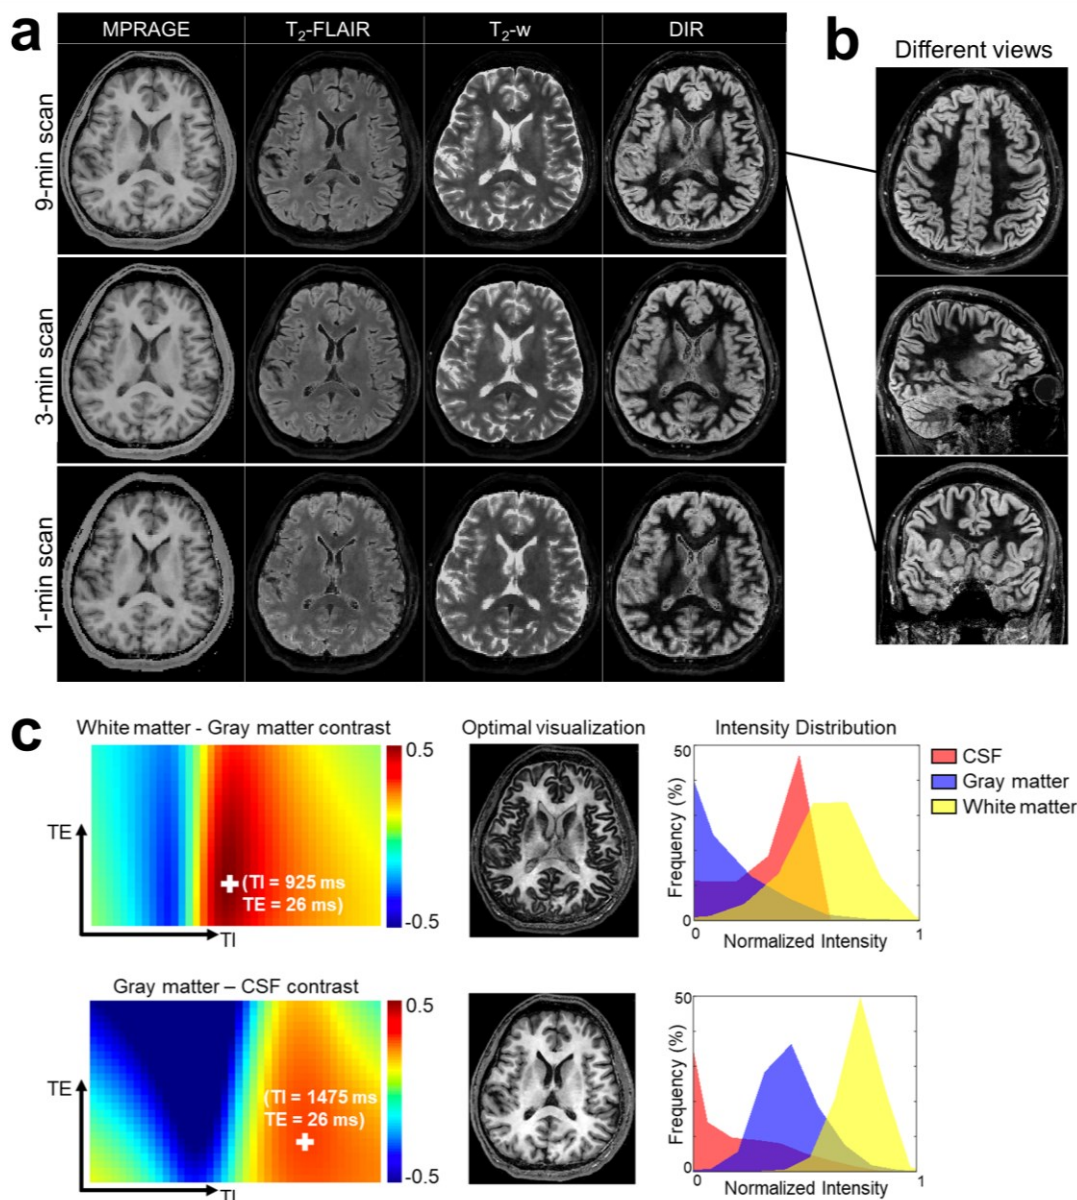

1  
2 Figure 8. Synthesized multi-contrast images using 3D-EPTI. **a**, Synthetic MPRAGE, T<sub>2</sub>-FLAIR, T<sub>2</sub>-weighted, and double-  
3 inversion recovery (DIR) contrasts from three protocols (9-min 0.7-mm protocol, 3-min 1-mm protocol, and 1-min 1.5-mm  
4 protocol). **b**, An example of the flexibility in visualization in different views of the synthesized images at high isotropic  
5 resolution. **c**, Examples of contrast-optimized visualization between target-tissue pair by adjusting sequence parameters (TI  
6 and TE). Two examples that maximize the contrast differences i) between white and gray matter, and ii) between gray matter  
7 and CSF, are presented. The spectrum of contrast difference between the two tissues (left panel) is used to select the  
8 parameters to synthesize the contrast for optimal visualization (middle panel). The intensity distribution of the optimized  
9 contrast in three tissues are shown on the right.

#### 10 4. Discussion

11 The goal of this study is to address the long-standing problem in quantitative MRI — the slow acquisition  
12 speed. The key concept in 3D-EPTI of exploiting spatiotemporal correlation at multiple timescales through new  
13 encoding strategies within and between its efficient continuous readouts was used to achieve rapid quantitative

1 MRI. This has allowed the acquisition of robust multi-parametric maps within minutes at high isotropic  
2 resolution with whole brain coverage. As a proof-of-concept, a 3D-EPTI sequence for simultaneous  $T_1$ ,  $T_2$  and  
3  $T_2^*$  mapping was developed and validated.

4 High intra-subject repeatability of the quantitative parameters obtained using 3D-EPTI was demonstrated  
5 across multiple healthy volunteers. This will be critical to the success of future deployment of 3D-EPTI to  
6 various applications such as in longitudinal monitoring of healthy and diseased tissues during complex  
7 biological process of brain development or pathophysiological progression of neurological diseases.  
8 Nonetheless, despite our efforts to minimize the bias in the repeatability assessment process itself, such as by  
9 using automatically segmented ROIs instead of manual ROIs, the small variations (bias < 0.8% and COV <  
10 2.27%) could still be partially caused by errors in the registration process to align the two scans for comparison.  
11 Moreover, inherent differences between scans are possible. For example,  $T_2^*$  shows slightly higher variability  
12 than  $T_1$  and  $T_2$ , which may be explained by the differences due to its dependence on head orientations relative  
13 to the main magnetic field.

14 The high inter-subject repeatability (COV < 5.09%) of the quantitative parameters obtained using 3D-EPTI  
15 on healthy volunteers points to its potential for use in establishing population-average norms or atlases.  
16 Currently, multi-parametric MRI atlases are still lacking, but the short scans enabled by 3D-EPTI can  
17 significantly improve the cost effectiveness and facilitate large-scale studies for this purpose. On the other hand,  
18 as expected, the inter-subject repeatability is lower than the intra-subject repeatability. This could reflect the  
19 ability of 3D-EPTI to detect inherent individual differences, pointing to its potential in providing sensitive  
20 quantitative biomarkers. However, some of the increased variability could also be attributed to the additional  
21 segmentation variabilities across subjects, especially in challenging areas. High intra- and inter-subject  
22 repeatability was also observed in the intra-cortical profiles obtained by 3D-EPTI. This illustrates the robust  
23 performance in using 3D-EPTI data to conduct reliable surface reconstruction and reveal repeatable subtle  
24 features across cortical layers. In addition to its potential for use in longitudinal monitoring and in establishing  
25 quantitative biomarkers, 3D-EPTI could be used to evaluate spatially varying profiles of cortical myelination  
26 and iron concentration.

27 The reliability of the quantitative measures obtained using 3D-EPTI was further validated by comparing  
28 them to ones obtained using lengthy standard acquisitions, where a generally high level of agreement was  
29 observed in both in-vivo (Fig. 5) and phantom (Supplementary Fig. 5) experiments. The largest difference was  
30 observed in the in-vivo  $T_1$ -values, with a bias level of 7.23%. This could potentially be attributed to the magnetic  
31 transfer (MT) effect, which causes a different level of exchange between water and macromolecular pools in  
32 different sequences. This can create discrepancies between the actual and the modelled signal evolutions in both  
33 3D-EPTI and in the standard acquisition, where the MT effect has not been accounted for. Such an effect is  
34 more prominent in  $T_1$  quantification, due to the use of an inversion recovery pulse. The characterization and  
35 disentanglement of the MT effect in quantitative mapping is an active area of research (Hilbert et al., 2020).  
36 Future work will investigate the incorporation of a MT-sensitive sequence module into the 3D-EPTI acquisition,  
37 and model the MT effect in both reconstruction and parameter fitting.



1 The concept of 3D-EPTI can be readily adopted to other pulse sequences for the quantification of other  
2 tissue parameters. For example, 3D-EPTI should be exceptionally well suited for parameters estimation for  
3 multiple-pool models (Dong et al., 2021a), because it can continuously track complex signal evolution at a very  
4 short time scale ( $< 1$  ms) to offer more degrees of freedom in estimating these parameters. The unique features  
5 of 3D-EPTI also open up many possibilities for further technical improvements. For example, the radial-block  
6 sampling of 3D-EPTI grants it the ability to monitor and correct subject movements between repetitions for  
7 motion-robust scanning (Dong et al., 2021b). Other advanced reconstruction algorithms, including machine  
8 learning and multi-dimensional low-rank tensor approach, may further improve the accuracy of time-resolving  
9 reconstruction. The adaptation of EPTI to non-Cartesian acquisitions can also help eliminate their potential  
10 distortion/blurring artifacts due to the long readouts and provide multi-contrast capability (Fair et al., 2020;  
11 Liberman et al., 2020a, b).

12 To summarize, we introduce a novel method, termed 3D-Echo Planar Time-Resolved Imaging (3D-EPTI),  
13 that enables high acceleration and significantly improved imaging efficiency for multi-parametric imaging. By  
14 pushing multi-parametric MRI into a fast regime (as short as 1 minute), 3D-EPTI should help facilitate a  
15 paradigm shift from qualitative to quantitative imaging in clinical practice, and also open up the possibility of  
16 acquiring multi-parametric maps at submillimeter isotropic resolution within a few minutes to reveal exquisite  
17 brain structures for neuroscientific research. With richer and more reproducible information obtained within a  
18 single scan, 3D-EPTI has the potential to increase patient throughput, patient compliance and cost effectiveness,  
19 paving the way for large-scale studies to establish new quantitative biomarkers for neurological diseases.

## 21 Acknowledgments

22 This work was supported by NIH NIBIB (R01-EB020613, R01-EB019437, R01-MH116173, P41-  
23 EB030006 and U01-EB025162) and by the MGH/HST Athinoula A. Martinos Center for Biomedical Imaging;  
24 and was made possible by the resources provided by NIH Shared Instrumentation Grants S10-RR023401, S10-  
25 RR023043, and S10-RR019307. We also thank Dr. Gliad Liberman's help on the GPU implementation of the  
26 image reconstruction.

## 28 References

- 29 1. Andre, J.B., Bresnahan, B.W., Mossa-Basha, M., Hoff, M.N., Smith, C.P., Anzai, Y., Cohen, W.A., 2015.  
30 Toward quantifying the prevalence, severity, and cost associated with patient motion during clinical MR  
31 examinations. *J Am Coll Radiol* 12, 689-695.
- 32 2. Annese, J., Pitiot, A., Dinov, I., Toga, A., 2004. A myelo-architectonic method for the structural  
33 classification of cortical areas. *Neuroimage* 21, 15-26.
- 34 3. Bernasconi, N., Bernasconi, A., Andermann, F., Dubeau, F., Feindel, W., Reutens, D.C., 1999. Entorhinal  
35 cortex in temporal lobe epilepsy: a quantitative MRI study. *Neurology* 52, 1870-1870.
- 36 4. Boyacioglu, R., Wang, C., Ma, D., McGivney, D.F., Yu, X., Griswold, M.A., 2021. 3D magnetic resonance  
37 fingerprinting with quadratic RF phase. *Magn Reson Med* 85, 2084-2094.
- 38 5. Boyd, S., Parikh, N., Chu, E., Peleato, B., Eckstein, J., 2011. Distributed optimization and statistical learning  
39 via the alternating direction method of multipliers. *Faund Trends Mach Learn* 3, 1-122.

- 1 6. Bozzali, M., Serra, L., Cercignani, M., 2016. Quantitative MRI to understand Alzheimer's disease  
2 pathophysiology. *Curr Opin Neurol* 29, 437-444.
- 3 7. Breuer, F.A., Blaimer, M., Heidemann, R.M., Mueller, M.F., Griswold, M.A., Jakob, P.M., 2005. Controlled  
4 aliasing in parallel imaging results in higher acceleration (CAIPIRINHA) for multi-slice imaging. *Magn  
5 Reson Med* 53, 684-691.
- 6 8. Breuer, F.A., Blaimer, M., Mueller, M.F., Seiberlich, N., Heidemann, R.M., Griswold, M.A., Jakob, P.M.,  
7 2006. Controlled aliasing in volumetric parallel imaging (2D CAIPIRINHA). *Magn Reson Med* 55, 549-  
8 556.
- 9 9. Cnaan, M.W., Bazin, P.L., Marques, J.P., de Hollander, G., Dumoulin, S.O., van der Zwaag, W., 2019.  
10 MP2RAGEME: T1, T2\*, and QSM mapping in one sequence at 7 tesla. *Hum Brain Mapp* 40, 1786-1798.
- 11 10. Calabrese, M., De Stefano, N., Atzori, M., Bernardi, V., Mattisi, I., Barachino, L., Morra, A., Rinaldi, L.,  
12 Romualdi, C., Perini, P., 2007. Detection of cortical inflammatory lesions by double inversion recovery  
13 magnetic resonance imaging in patients with multiple sclerosis. *Arch Neurol* 64, 1416-1422.
- 14 11. Carey, D., Caprini, F., Allen, M., Lutti, A., Weiskopf, N., Rees, G., Callaghan, M.F., Dick, F., 2018.  
15 Quantitative MRI provides markers of intra-, inter-regional, and age-related differences in young adult  
16 cortical microstructure. *Neuroimage* 182, 429-440.
- 17 12. Christodoulou, A.G., Shaw, J.L., Nguyen, C., Yang, Q., Xie, Y., Wang, N., Li, D., 2018. Magnetic resonance  
18 multitasking for motion-resolved quantitative cardiovascular imaging. *Nat Biomed Eng* 2, 215-226.
- 19 13. Cloos, M.A., Knoll, F., Zhao, T., Block, K.T., Bruno, M., Wiggins, G.C., Sodickson, D.K., 2016.  
20 Multiparametric imaging with heterogeneous radiofrequency fields. *Nat Commun* 7, 1-10.
- 21 14. Cohen-Adad, J., Polimeni, J.R., Helmer, K.G., Benner, T., McNab, J.A., Wald, L.L., Rosen, B.R., Mainero,  
22 C., 2012. T2\* mapping and B0 orientation-dependence at 7 T reveal cyto-and myeloarchitecture  
23 organization of the human cortex. *Neuroimage* 60, 1006-1014.
- 24 15. Deoni, S.C., Rutt, B.K., Peters, T.M., 2003. Rapid combined T1 and T2 mapping using gradient recalled  
25 acquisition in the steady state. *Magn Reson Med* 49, 515-526.
- 26 16. Desikan, R.S., Ségonne, F., Fischl, B., Quinn, B.T., Dickerson, B.C., Blacker, D., Buckner, R.L., Dale, A.M.,  
27 Maguire, R.P., Hyman, B.T., 2006. An automated labeling system for subdividing the human cerebral cortex  
28 on MRI scans into gyral based regions of interest. *Neuroimage* 31, 968-980.
- 29 17. Dong, Z., Wang, F., Chan, K.-S., Reese, T.G., Bilgic, B., Marques, J.P., Setsompop, K., 2021a. Variable flip  
30 angle echo planar time-resolved imaging (vFA-EPTI) for fast high-resolution gradient echo myelin water  
31 imaging. *Neuroimage* 232, 117897.
- 32 18. Dong, Z., Wang, F., Reese, T.G., Bilgic, B., Setsompop, K., 2020. Echo planar time-resolved imaging with  
33 subspace reconstruction and optimized spatiotemporal encoding. *Magn Reson Med* 84, 2442-2455.
- 34 19. Dong, Z., Wang, F., Reese, T.G., Manhard, M.K., Bilgic, B., Wald, L.L., Guo, H., Setsompop, K., 2019.  
35 Tilted-CAIPI for highly accelerated distortion-free EPI with point spread function (PSF) encoding. *Magn  
36 Reson Med* 81, 377-392.
- 37 20. Dong, Z., Wang, F., Xiang, J., Setsompop, K., 2021b. Motion-corrected 3D-EPTI with 4D navigator for fast  
38 and robust whole-brain quantitative imaging. In *Proc Intl Soc Mag Reson Med*, p0119.
- 39 21. Fair, M.J., Wang, F., Dong, Z., Reese, T.G., Setsompop, K., 2020. Propeller echo-planar time-resolved  
40 imaging with dynamic encoding (PEPTIDE). *Magn Reson Med* 83, 2124-2137.
- 41 22. Falangola, M., Dyakin, V., Lee, S., Bogart, A., Babb, J., Duff, K., Nixon, R., Helpert, 2007. Quantitative  
42 MRI reveals aging-associated T2 changes in mouse models of Alzheimer's disease. *NMR Biomed* 20, 343-  
43 351.
- 44 23. Feinberg, D.A., Oshio, K., 1991. GRASE (gradient-and spin-echo) MR imaging: a new fast clinical imaging  
45 technique. *Radiology* 181, 597-602.
- 46 24. Filo, S., Shtangel, O., Salamon, N., Kol, A., Weisinger, B., Shifman, S., Mezer, A.A., 2019. Disentangling  
47 molecular alterations from water-content changes in the aging human brain using quantitative MRI. *Nat  
48 Commun* 10, 1-16.
- 49 25. Fischl, B., 2012. FreeSurfer. *Neuroimage* 62, 774-781.
- 50 26. Fischl, B., Salat, D.H., Busa, E., Albert, M., Dieterich, M., Haselgrove, C., Van Der Kouwe, A., Killiany,  
51 R., Kennedy, D., Klaveness, S., 2002. Whole brain segmentation: automated labeling of neuroanatomical  
52 structures in the human brain. *Neuron* 33, 341-355.
- 53 27. Fujita, S., Hagiwara, A., Hori, M., Warntjes, M., Kamagata, K., Fukunaga, I., Andica, C., Maekawa, T., Irie,  
54 R., Takemura, M.Y., 2019. Three-dimensional high-resolution simultaneous quantitative mapping of the  
55 whole brain with 3D-QALAS: an accuracy and repeatability study. *Magn Reson Imaging* 63, 235-243.

- 1 28. Glasser, M.F., Goyal, M.S., Preuss, T.M., Raichle, M.E., Van Essen, D.C., 2014. Trends and properties of  
2 human cerebral cortex: correlations with cortical myelin content. *Neuroimage* 93, 165-175.
- 3 29. Griswold, M.A., Jakob, P.M., Heidemann, R.M., Nittka, M., Jellus, V., Wang, J., Kiefer, B., Haase, A., 2002.  
4 Generalized autocalibrating partially parallel acquisitions (GRAPPA). *Magn Reson Med* 47, 1202-1210.
- 5 30. Guo, R., Zhao, Y., Li, Y., Wang, T., Li, Y., Sutton, B., Liang, Z.P., 2020. Simultaneous QSM and metabolic  
6 imaging of the brain using SPICE: Further improvements in data acquisition and processing. *Magn Reson*  
7 *Med* 85, 970-977 (2021).
- 8 31. Haast, R.A., Ivanov, D., Formisano, E., Uludağ, K., 2016. Reproducibility and reliability of quantitative  
9 and weighted T1 and T2\* mapping for myelin-based cortical parcellation at 7 Tesla. *Front Neuroanat* 10,  
10 112.
- 11 32. He, J., Liu, Q., Christodoulou, A.G., Ma, C., Lam, F., Liang, Z.P., 2016. Accelerated High-Dimensional MR  
12 Imaging With Sparse Sampling Using Low-Rank Tensors. *IEEE Trans Med Imaging* 35, 2119-2129.
- 13 33. Hilbert, T., Xia, D., Block, K.T., Yu, Z., Lattanzi, R., Sodickson, D.K., Kober, T., Cloos, M.A., 2020.  
14 Magnetization transfer in magnetic resonance fingerprinting. *Magn Reson Med* 84, 128-141.
- 15 34. Hong, T., Han, D., Kim, D.H., 2019. Simultaneous estimation of PD, T1, T2, T2\*, and  $\Delta B_0$  using magnetic  
16 resonance fingerprinting with background gradient compensation. *Magn Reson Med* 81, 2614-2623.
- 17 35. Ing, C., DiMaggio, C., Whitehouse, A., Hegarty, M.K., Brady, J., von Ungern-Sternberg, B.S., Davidson,  
18 A., Wood, A.J., Li, G., Sun, L.S., 2012. Long-term differences in language and cognitive function after  
19 childhood exposure to anesthesia. *Pediatrics* 130, e476-e485.
- 20 36. Jenkinson, M., Bannister, P., Brady, M., Smith, S., 2002. Improved optimization for the robust and accurate  
21 linear registration and motion correction of brain images. *Neuroimage* 17, 825-841.
- 22 37. Jenkinson, M., Beckmann, C.F., Behrens, T.E., Woolrich, M.W., Smith, S.M., 2012. *Fsl*. *Neuroimage* 62,  
23 782-790.
- 24 38. Jenkinson, M., Smith, S.J., 2001. A global optimisation method for robust affine registration of brain images.  
25 *Med. Image Anal* 5, 143-156.
- 26 39. Jiang, Y., Ma, D., Seiberlich, N., Gulani, V., Griswold, M.A., 2015. MR fingerprinting using fast imaging  
27 with steady state precession (FISP) with spiral readout. *Magn Reson Med* 74, 1621-1631.
- 28 40. Krauss, W., Gunnarsson, M., Andersson, T., Thunberg, P., 2015. Accuracy and reproducibility of a  
29 quantitative magnetic resonance imaging method for concurrent measurements of tissue relaxation times  
30 and proton density. *Magn Reson Imaging* 33, 584-591.
- 31 41. Lam, F., Liang, Z.P., 2014. A subspace approach to high-resolution spectroscopic imaging. *Magn Reson*  
32 *Med* 71, 1349-1357.
- 33 42. Lescher, S., Jurcoane, A., Veit, A., Bähr, O., Deichmann, R., Hattungen, E., 2015. Quantitative T1 and T2  
34 mapping in recurrent glioblastomas under bevacizumab: earlier detection of tumor progression compared  
35 to conventional MRI. *Neuroradiology* 57, 11-20.
- 36 43. Liang, Z.-P., 2007. Spatiotemporal imaging with partially separable functions. 2007. In *Proc 4th IEEE Int*  
37 *Symp Biomed Imaging*, pp. 988-991.
- 38 44. Liberman, G., Wang, F., Dong, Z., Setsompop, K., 2020a. Flexible model-based reconstruction through  
39 generalized cycled parameter splitting approach., In *Proc of the 29th Annual Meeting of ISMRM*, p. 0884.
- 40 45. Liberman, G., Wang, F., Dong, Z., Setsompop, K., 2020b. Spiral Crisscrossing Echo Planar Time-resolved  
41 Imaging (SCEPTI). In *Proc Intl Soc Mag Reson Med*, p0616.
- 42 46. Lustig, M., Donoho, D., Pauly, J.M., 2007. Sparse MRI: The application of compressed sensing for rapid  
43 MR imaging. *Magn Reson Med* 58, 1182-1195.
- 44 47. Lutti, A., Dick, F., Sereno, M.I., Weiskopf, N., 2014. Using high-resolution quantitative mapping of R1 as  
45 an index of cortical myelination. *Neuroimage* 93, 176-188.
- 46 48. Ma, D., Gulani, V., Seiberlich, N., Liu, K., Sunshine, J.L., Duerk, J.L., Griswold, M.A., 2013. Magnetic  
47 resonance fingerprinting. *Nature* 495, 187-192.
- 48 49. Ma, D., Jones, S.E., Deshmane, A., Sakaie, K., Pierre, E.Y., Larvie, M., McGivney, D., Blümcke, I.,  
49 Krishnan, B., Lowe, M., 2018. Development of high-resolution 3D MR fingerprinting for detection and  
50 characterization of epileptic lesions. *J Magn Reson Imaging* 49, 1333-1346
- 51 50. Ma, S., Nguyen, C.T., Han, F., Wang, N., Deng, Z., Binesh, N., Moser, F.G., Christodoulou, A.G., Li, D.,  
52 2020. Three-dimensional simultaneous brain T1, T2, and ADC mapping with MR Multitasking. *Magn*  
53 *Reson Med* 84, 72-88.
- 54 51. Ma, S., Wang, N., Fan, Z., Kaisey, M., Sicotte, N.L., Christodoulou, A.G., Li, D., 2021. Three-dimensional  
55 whole-brain simultaneous T1, T2, and T1 $\rho$  quantification using MR Multitasking: Method and initial

- 1 clinical experience in tissue characterization of multiple sclerosis. *Magn Reson Med* 85, 1938–1952.
- 2 52. Mansfield, P., 1977. Multi-planar image formation using NMR spin echoes. *J Phys C Solid State Phys* 10,
- 3 L55.
- 4 53. Marques, J.P., Khabipova, D., Gruetter, R., 2017. Studying cyto and myeloarchitecture of the human cortex
- 5 at ultra-high field with quantitative imaging: R1, R2\* and magnetic susceptibility. *Neuroimage* 147, 152-
- 6 163.
- 7 54. Meng, Z., Guo, R., Li, Y., Guan, Y., Wang, T., Zhao, Y., Sutton, B., Li, Y., Liang, Z.P., 2021. Accelerating
- 8 T2 mapping of the brain by integrating deep learning priors with low-rank and sparse modeling. *Magn*
- 9 *Reson Med* 85, 1455-1467.
- 10 55. Metere, R., Kober, T., Möller, H.E., Schäfer, A., 2017. Simultaneous quantitative MRI mapping of T1, T
- 11 2\* and magnetic susceptibility with multi-echo MP2RAGE. *PLoS One* 12, e0169265.
- 12 56. Müller, A., Jurcoane, A., Kebir, S., Ditter, P., Schrader, F., Herrlinger, U., Tzaridis, T., Mädler, B., Schild,
- 13 H.H., Glas, M., 2017. Quantitative T1-mapping detects cloudy-enhancing tumor compartments predicting
- 14 outcome of patients with glioblastoma. *Cancer med* 6, 89-99.
- 15 57. Oshio, K., Feinberg, D.A., 1991. GRASE (gradient-and spin-echo) imaging: a novel fast MRI technique.
- 16 *Magn. Reson. Med* 20, 344-349.
- 17 58. Pruessmann, K.P., Weiger, M., Scheidegger, M.B., Boesiger, P., 1999. SENSE: sensitivity encoding for fast
- 18 MRI. *Magn Reson Med* 42, 952-962.
- 19 59. Ramani, A., Jensen, J.H., Helpert, J.A., 2006. Quantitative MR imaging in Alzheimer disease. *Radiology*
- 20 241, 26-44.
- 21 60. Reitz, S.C., Hof, S.M., Fleischer, V., Brodski, A., Groger, A., Gracien, R.M., Droby, A., Steinmetz, H.,
- 22 Ziemann, U., Zipp, F., Deichmann, R., Klein, J.C., 2017. Multi-parametric quantitative MRI of normal
- 23 appearing white matter in multiple sclerosis, and the effect of disease activity on T2. *Brain Imaging Behav*
- 24 11, 744-753.
- 25 61. Sled, J.G., Nossin-Manor, R., 2013. Quantitative MRI for studying neonatal brain development.
- 26 *Neuroradiology* 55, 97-104.
- 27 62. Sodickson, D.K., Manning, W.J., 1997. Simultaneous acquisition of spatial harmonics (SMASH): Fast
- 28 imaging with radiofrequency coil arrays. *Magn Reson Med* 38, 591-603.
- 29 63. Tamir, J.I., Ong, F., Cheng, J.Y., Uecker, M., Lustig, M., 2016. Generalized magnetic resonance image
- 30 reconstruction using the Berkeley advanced reconstruction toolbox. *ISMRM Workshop on Data Sampling*
- 31 *& Image Reconstruction*, Sedona, AZ.
- 32 64. Tamir, J.I., Uecker, M., Chen, W., Lai, P., Alley, M.T., Vasanawala, S.S., Lustig, M., 2017. T2 shuffling:
- 33 sharp, multicontrast, volumetric fast spin-echo imaging. *Magn Reson Med* 77, 180-195.
- 34 65. Tardif, C.L., Bedell, B.J., Eskildsen, S.F., Collins, D.L., Pike, G.B., 2011. Quantitative magnetic resonance
- 35 imaging of cortical multiple sclerosis pathology. *Mult Scler Int* 2012.
- 36 66. Tofts, P., 2005. *Quantitative MRI of the brain: measuring changes caused by disease*. John Wiley & Sons.
- 37 67. Trampel, R., Bazin, P.-L., Pine, K., Weiskopf, N., 2019. In-vivo magnetic resonance imaging (MRI) of
- 38 laminae in the human cortex. *Neuroimage* 197, 707-715.
- 39 68. Uecker, M., Ong, F., Tamir, J.I., Bahri, D., Virtue, P., Cheng, J.Y., Zhang, T., Lustig, M., 2015. Berkeley
- 40 advanced reconstruction toolbox. In *Proc Intl Soc Mag Reson Med*, p2802.
- 41 69. Waehnert, M., Dinse, J., Weiss, M., Streicher, M.N., Waehnert, P., Geyer, S., Turner, R., Bazin, P.-L., 2014.
- 42 Anatomically motivated modeling of cortical laminae. *Neuroimage* 93, 210-220.
- 43 70. Waehnert, M.D., Dinse, J., Schäfer, A., Geyer, S., Bazin, P.-L., Turner, R., Tardif, C.L., 2016. A subject-
- 44 specific framework for in vivo myeloarchitectonic analysis using high resolution quantitative MRI.
- 45 *Neuroimage* 125, 94-107.
- 46 71. Wang, F., Dong, Z., Reese, T.G., Bilgic, B., Katherine Manhard, M., Chen, J., Polimeni, J.R., Wald, L.L.,
- 47 Setsompop, K., 2019a. Echo planar time-resolved imaging (EPTI). *Magn Reson Med* 81, 3599-3615.
- 48 72. Wang, F., Dong, Z., Reese, T.G., Wald, L.L., Setsompop, K., 2019b. 3D-EPTI for ultra-fast multi-contrast
- 49 and quantitative imaging. In *Proc Intl Soc Mag Reson Med*, p944.
- 50 73. Wang, F., Dong, Z., Wald, L.L., Polimeni, J.R., Setsompop, K., 2021. Simultaneous pure T2 and varying
- 51 T2'-weighted BOLD fMRI using Echo Planar Time-resolved Imaging (EPTI) for mapping laminar fMRI
- 52 responses. *bioRxiv*.
- 53 74. Warntjes, J., Dahlqvist, O., Lundberg, P., 2007. Novel method for rapid, simultaneous T1, T\* 2, and proton
- 54 density quantification. *Magn Reson Med* 57, 528-537.
- 55 75. Warntjes, J., Leinhard, O.D., West, J., Lundberg, P., 2008. Rapid magnetic resonance quantification on the



- 1 brain: optimization for clinical usage. *Magn Reson Med* 60, 320-329.
- 2 76. Warntjes, M., Engström, M., Tisell, A., Lundberg, P., 2016. Modeling the presence of myelin and edema in  
3 the brain based on multi-parametric quantitative MRI. *Frontiers in neurology* 7, 16.
- 4 77. Wattjes, M., Lutterbey, G., Gieseke, J., Träber, F., Klotz, L., Schmidt, S., Schild, H., 2007. Double inversion  
5 recovery brain imaging at 3T: diagnostic value in the detection of multiple sclerosis lesions. *Am J*  
6 *Neuroradiol* 28, 54-59.
- 7 78. Weigel, M., 2015. Extended phase graphs: dephasing, RF pulses, and echoes-pure and simple. *J Magn*  
8 *Reson Imaging* 41, 266-295.
- 9 79. West, J., Aalto, A., Tisell, A., Leinhard, O.D., Landtblom, A.M., Smedby, O., Lundberg, P., 2014. Normal  
10 appearing and diffusely abnormal white matter in patients with multiple sclerosis assessed with quantitative  
11 MR. *PLoS One* 9, e95161.
- 12 80. Wyatt, C.R., Smith, T.B., Sammi, M.K., Rooney, W.D., Guimaraes, A.R., 2018. Multi-parametric T2\*  
13 magnetic resonance fingerprinting using variable echo times. *NMR Biomed* 31, e3951.
- 14 81. Zhao, B., Lu, W., Hitchens, T.K., Lam, F., Ho, C., Liang, Z.P., 2015. Accelerated MR parameter mapping  
15 with low-rank and sparsity constraints. *Magn Reson Med* 74, 489-498.
- 16 82. Zhao, B., Setsompop, K., Adalsteinsson, E., Gagoski, B., Ye, H., Ma, D., Jiang, Y., Ellen Grant, P., Griswold,  
17 M.A., Wald, L.L., 2018. Improved magnetic resonance fingerprinting reconstruction with low-rank and  
18 subspace modeling. *Magn Reson Med* 79, 933-942.
- 19



## 1 Supplementary Information

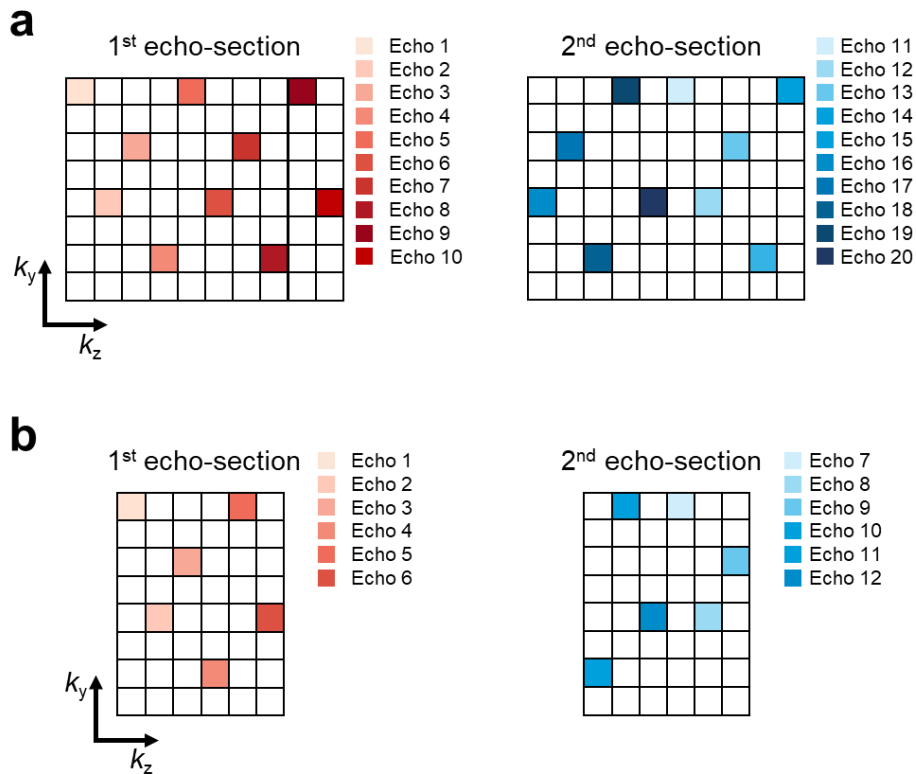

2

3 Supplementary Figure 1. The encoding patterns in  $k_y$ - $k_z$ - $t$  space for (a) the 1.5-mm and 1-mm protocols, and (b)

4 the 0.7 mm protocol. Two CAIPI patterns (red and blue) are interleaved across echoes in different echo sections

5 to provide more complementary samplings (i.e., red for 1<sup>st</sup> echo section, blue for 2<sup>nd</sup>, red for 3<sup>rd</sup>, blue for 4<sup>th</sup>,

6 etc.). An acceleration factor of 80 ( $k_y \times k_z = 8 \times 10$ ) was used for the 1.5-mm and 1-mm acquisitions, while a

7 smaller acceleration factor of 48 ( $k_y \times k_z = 8 \times 6$ ) was used for the 0.7-mm acquisition to compensate for the

8 larger time interval (larger echo spacing).

9

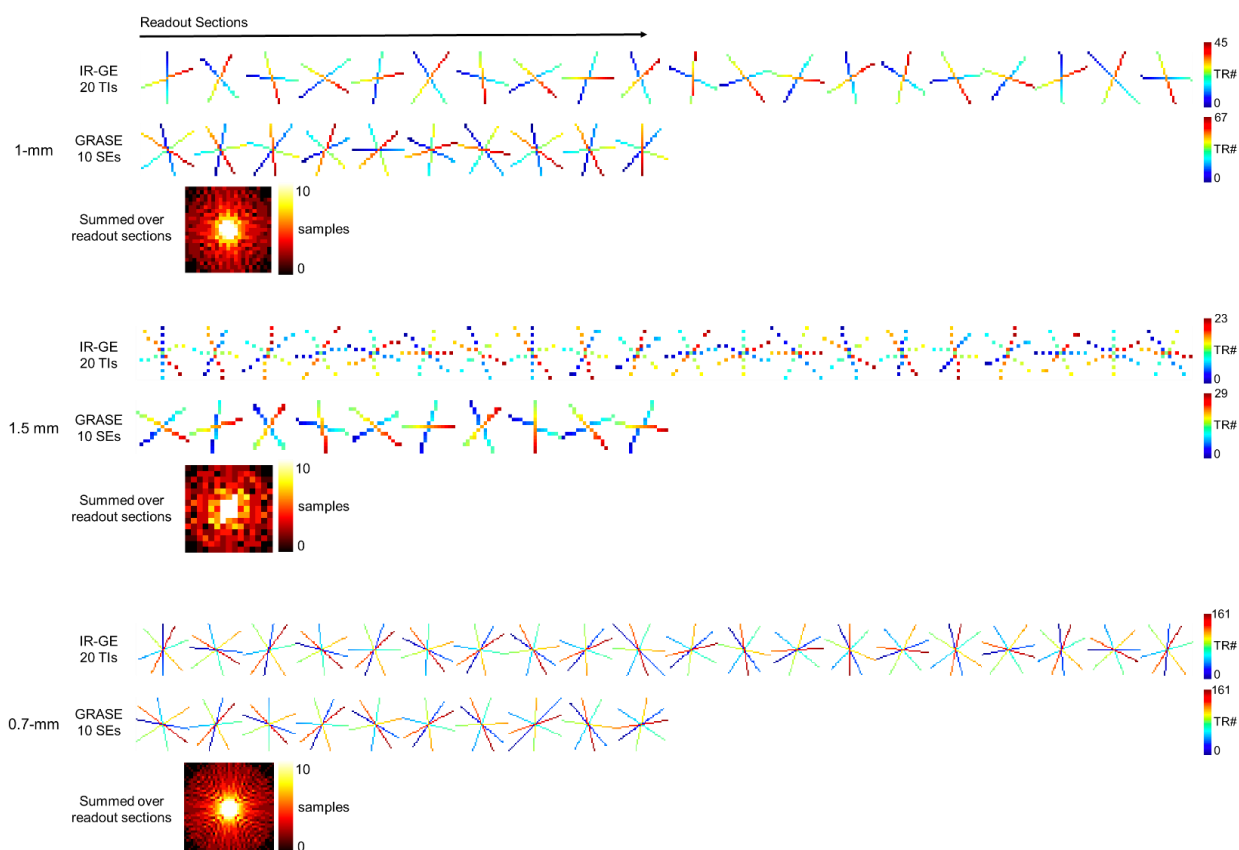

1

2 Supplementary Figure 2. The golden-angle radial-block sampling pattern used in the designed protocols (top:  
3 1-mm protocol, middle: 1.5-mm protocol, bottom: 0.7-mm protocol). Each color-coded point represents one  
4 sampling block acquired in a 3D-EPTI readout. After a few TRs, the sampling blocks acquired in the same  
5 readout section will form a radial-block pattern. The color coding represents the acquisition order of the blocks.  
6 For example, the index of TR (TR#) counts from 0 to the maximum, illustrated from blue to red. The combined  
7 sampling patterns across all readout sections in IR-GE and VFA-GRASE result in a variable density pattern as  
8 shown in the bottom.

9

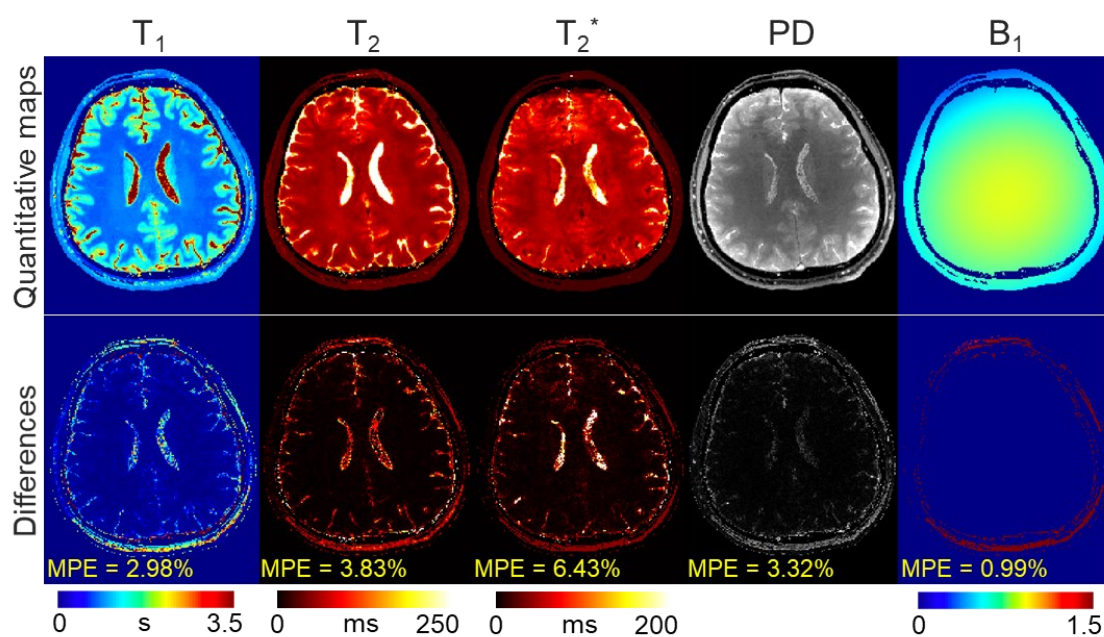

1

2

3

4

5

6

7

Supplementary Figure 3. Results of the simulation experiment. The quantitative maps obtained by 3D-EPTI (3-min 1-mm protocol) were compared to the gold standard reference maps that were used to simulate the 3D-EPTI data. The difference maps ( $\times 2$ : magnified by a factor of 2) were calculated by subtracting the reference maps from the estimated quantitative maps. MPE: mean percentage error.

### $B_1^+$ estimated from 3D-EPTI protocols

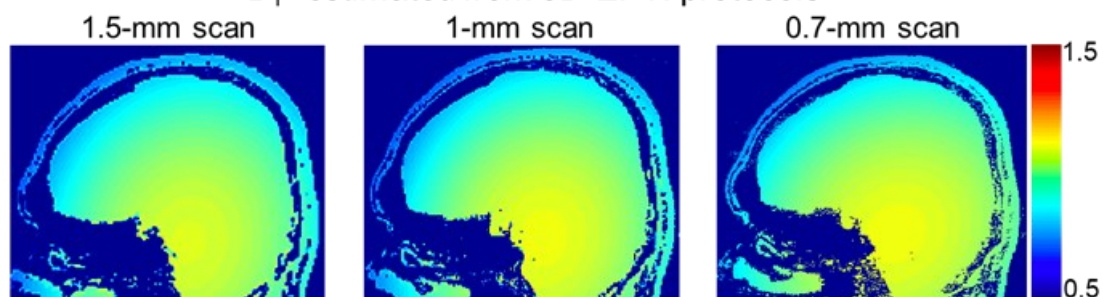

8

9

10

11

Supplementary Figure 4. The estimation of  $B_1^+$  field on the same subject from three 3D-EPTI scans at different resolutions.

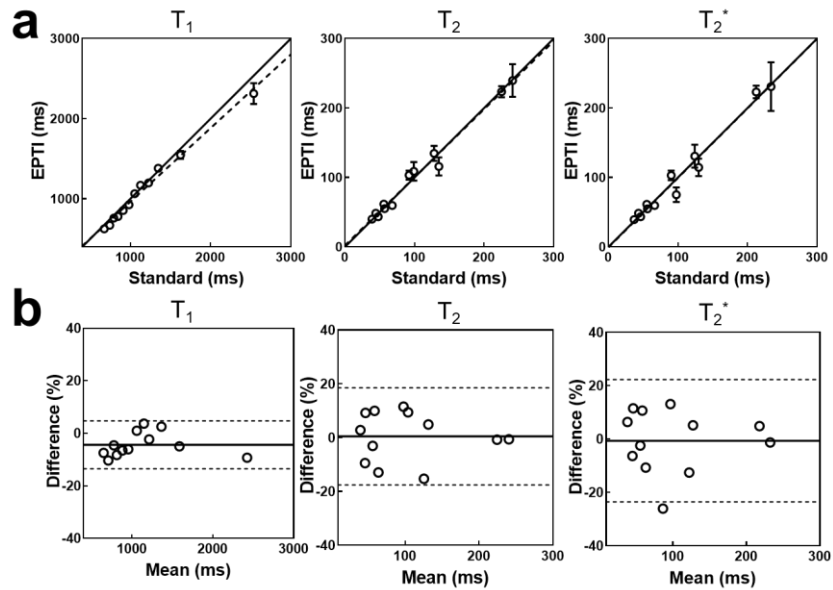

1

2 Supplementary Figure 5. Comparison of the quantitative measurements between 3D-EPTI and standard  
 3 acquisitions in the phantom experiment. **a**, Scatter plots of the quantitative values in 12 ROIs, shown along with  
 4 the identity line (solid) and the regressed line (dashed). **b**, Bland-Altman plots of the same data with the mean  
 5 differences or the estimated biases (solid lines) and the 95% limits of agreements (dotted lines).

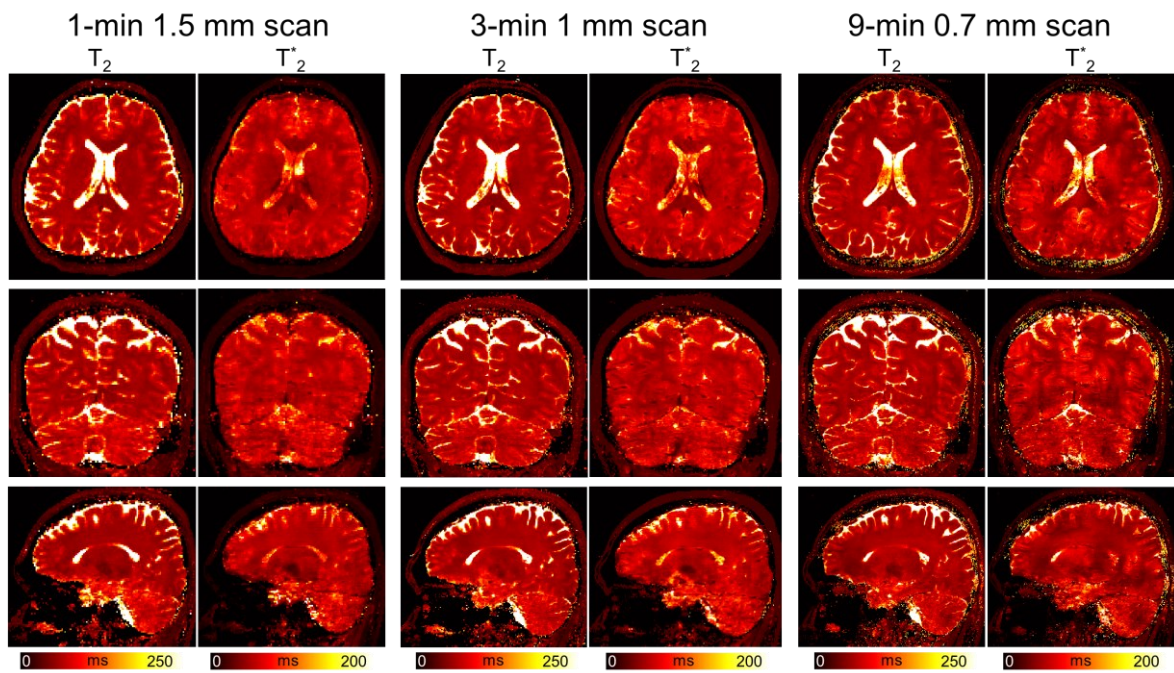

6

7 Supplementary Figure 6. The estimated  $T_2$  and  $T_2^*$  maps from three different protocols on the same subject.  
 8 Left panel: 1-minute protocol at 1.5-mm isotropic resolution; middle panel: 3-minute protocol at 1-mm isotropic  
 9 resolution; right panel: 9-minute protocol at 0.7-mm isotropic resolution.

10
